# Supplementary material for: Diseases with oral manifestations among adult asthmatics in Finland: a population-based matched cohort study
Source: PubMed Central journal article supplement — BMJ Open. 2021 Dec 31;11(12):e053133. doi: 10.1136/bmjopen-2021-053133 (PMC8720978; doi:10.1136/bmjopen-2021-053133), 2021-12-31
Supplement: bmjopen-2021-053133.draft_revisions.pdf [file bmjopen-2021-053133.draft_revisions.pdf]

# BMJ Open

BMJ Open is committed to open peer review. As part of this commitment we make the peer review history of every article we publish publicly available.

When an article is published we post the peer reviewers' comments and the authors' responses online. We also post the versions of the paper that were used during peer review. These are the versions that the peer review comments apply to.

The versions of the paper that follow are the versions that were submitted during the peer review process. They are not the versions of record or the final published versions. They should not be cited or distributed as the published version of this manuscript.

BMJ Open is an open access journal and the full, final, typeset and author-corrected version of record of the manuscript is available on our site with no access controls, subscription charges or pay-per-view fees (<http://bmjopen.bmj.com>).

If you have any questions on BMJ Open's open peer review process please email [info.bmjopen@bmj.com](mailto:info.bmjopen@bmj.com)

# BMJ Open

## DISEASES WITH ORAL MANIFESTATIONS AMONG ADULT ASTHMATICS

|                               |                                                                                                                                                                                                                                                                                                                                                                                                                                                                                                                                                                                                                             |
|-------------------------------|-----------------------------------------------------------------------------------------------------------------------------------------------------------------------------------------------------------------------------------------------------------------------------------------------------------------------------------------------------------------------------------------------------------------------------------------------------------------------------------------------------------------------------------------------------------------------------------------------------------------------------|
| Journal:                      | <i>BMJ Open</i>                                                                                                                                                                                                                                                                                                                                                                                                                                                                                                                                                                                                             |
| Manuscript ID                 | bmjopen-2021-053133                                                                                                                                                                                                                                                                                                                                                                                                                                                                                                                                                                                                         |
| Article Type:                 | Original research                                                                                                                                                                                                                                                                                                                                                                                                                                                                                                                                                                                                           |
| Date Submitted by the Author: | 06-May-2021                                                                                                                                                                                                                                                                                                                                                                                                                                                                                                                                                                                                                 |
| Complete List of Authors:     | Lemmetyinen, Riikka; University of Helsinki; University of Helsinki, Department of Public Health<br>Karjalainen, Jussi; Tampere University Hospital; Tampere University<br>But, Anna; University of Helsinki, Department of Public Health<br>Renkonen, Risto ; University of Helsinki; Helsinki University Hospital<br>Pekkanen, Juha; University of Helsinki, Department of Public Health;<br>National Institute for Health and Welfare<br>Haukka, Jari; University of Helsinki, Public Health<br>Toppila-Salmi, Sanna; University of Helsinki, Haartman Institute;<br>Helsinki University Hospital, Department of Allergy |
| Keywords:                     | EPIDEMIOLOGY, ORAL MEDICINE, PUBLIC HEALTH, Asthma < THORACIC MEDICINE                                                                                                                                                                                                                                                                                                                                                                                                                                                                                                                                                      |
|                               |                                                                                                                                                                                                                                                                                                                                                                                                                                                                                                                                                                                                                             |

SCHOLARONE™  
Manuscripts

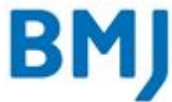

I, the Submitting Author has the right to grant and does grant on behalf of all authors of the Work (as defined in the below author licence), an exclusive licence and/or a non-exclusive licence for contributions from authors who are: i) UK Crown employees; ii) where BMJ has agreed a CC-BY licence shall apply, and/or iii) in accordance with the terms applicable for US Federal Government officers or employees acting as part of their official duties; on a worldwide, perpetual, irrevocable, royalty-free basis to BMJ Publishing Group Ltd ("BMJ") its licensees and where the relevant Journal is co-owned by BMJ to the co-owners of the Journal, to publish the Work in this journal and any other BMJ products and to exploit all rights, as set out in our [licence](#).

The Submitting Author accepts and understands that any supply made under these terms is made by BMJ to the Submitting Author unless you are acting as an employee on behalf of your employer or a postgraduate student of an affiliated institution which is paying any applicable article publishing charge ("APC") for Open Access articles. Where the Submitting Author wishes to make the Work available on an Open Access basis (and intends to pay the relevant APC), the terms of reuse of such Open Access shall be governed by a Creative Commons licence – details of these licences and which [Creative Commons](#) licence will apply to this Work are set out in our licence referred to above.

Other than as permitted in any relevant BMJ Author's Self Archiving Policies, I confirm this Work has not been accepted for publication elsewhere, is not being considered for publication elsewhere and does not duplicate material already published. I confirm all authors consent to publication of this Work and authorise the granting of this licence.

# DISEASES WITH ORAL MANIFESTATIONS AMONG ADULT ASTHMATICS

Lemmetyinen R<sup>1,2</sup>, Karjalainen J<sup>3,4</sup>, But A<sup>2</sup>, Renkonen R<sup>1,5</sup>, Pekkanen J<sup>2,6</sup> Haukka J<sup>2\*</sup>, Toppila-Salmi S<sup>1,7\*</sup>

<sup>1</sup>Haartman Institute, University of Helsinki, Helsinki, Finland

<sup>2</sup>Department of Public Health, University of Helsinki, Helsinki, Finland

<sup>3</sup>Allergy Centre, Tampere University Hospital, Tampere, Finland

<sup>4</sup>Faculty of Medicine and Health Technology, Tampere University, Tampere, Finland

<sup>5</sup>HUSLAB, Helsinki University Hospital, Helsinki, Finland

<sup>6</sup>National Institute for Health and Welfare, Helsinki, Finland

<sup>7</sup>Department of Allergy, University of Helsinki and Helsinki University Hospital, Helsinki, Finland

\*Shared last author

Address correspondence and reprint requests to

Riikka Lemmetyinen, DDS, Transplantation Laboratory, Haartman Institute, PO Box 21

(Haartmaninkatu 3), FI 00014 University of Helsinki, Finland, riikka.lemmetyinen@helsinki.fi

## ABSTRACT

**Objectives:** Many comorbidities are associated to adult asthma and may increase the asthma burden. Aim of this study was to investigate the hazard rate of oral diseases or oral manifesting diseases in asthmatic adults compared to non-asthmatic adults.

**Design:** Population-based matched cohort study with 13.8 years of follow-up.

**Setting:** A baseline questionnaire and follow-up data from the national hospital discharge registry of the National Institute for Health and Welfare in Finland.

**Participants:** Total of 1,394 adults with asthma were matched with 2,398 adults without asthma by gender, age and area of residence. Asthmatic adults were identified from the Drug Reimbursement Register of the Finnish Social Insurance Institution, as those who had a special drug reimbursement right due to asthma. Participants without asthma were identified from the Population Register.

**Main outcomes and measures:** Oral health related main diagnoses were retrieved using codes of International Classification of Diseases (ICD-10), and divided into disease groups. Cox's proportional hazards models stratified by matching unit (sex, age and area of residence), and models matched and adjusted for pack-years, education level, and body mass index (when possible), were used to evaluate the matched and additionally adjusted hazard ratios (HR) of diseases between asthmatic and non-asthmatic groups.

**Results:** Adult asthma was associated with an any oral manifesting disease (adjusted hazard ratio 1.41, confidence interval 1.11–1.80), herpes zoster (adjusted HR 6.18, 1.21–31.6), benign tumors of

1  
2  
3 oral cavity and pharynx (matched HR 1.94, 1.05–3.56), and dermatological diseases (pemphigus,  
4 pemphigoid, dermatitis herpetiformis, psoriasis, and lichen planus, HR 1.67, 1.01–2.78).  
5  
6  
7  
8  
9

10 **Conclusions:** Risk of having an oral disease or oral manifesting disease was increased among adult  
11 asthmatics.  
12  
13  
14  
15  
16

### 17 **Strengths and limitations of this study**

- 18 • This study is a population-based, matched cohort set up with almost 14 years of follow-up.
- 19 • Asthma diagnosis was confirmed with a medical doctor, and based on lung function tests and  
20 typical medical history.
- 21 • The study lacks data of primary care, where common dental or oral problems, such as  
22 periodontitis, are usually treated.
- 23 • There is a possibility of detection bias due to the more intensive use of healthcare services  
24 by asthmatics (and people with any moderate to severe chronic disease) than non-asthmatic  
25 subjects, which could have affected the results.  
26  
27  
28  
29  
30  
31  
32  
33  
34  
35  
36  
37  
38  
39  
40

41 Abstract word count: 253

42 Total word count: 2978

43 Total number of tables/figures: 4

44 Number of references: 41

45 Keywords: epidemiology, oral medicine, public health, asthma  
46  
47  
48  
49  
50

## 51 **INTRODUCTION**

52  
53  
54  
55  
56  
57  
58  
59  
60

1  
2  
3 Asthma is recognized for its characteristic pattern of symptoms, such as timing, triggers and  
4  
5 response to treatments. Common symptoms include wheezing, shortness of breath, chest tightness,  
6  
7 and cough, yet careful history taking is crucial for differential diagnosis. Asthma is one of the most  
8  
9 common chronic diseases in children and adults. Prevalence of asthma in adults is ranging from  
10  
11 0.2% to 21.0%, being highest in developed countries and is most likely underestimated in poorer  
12  
13 ones. [1] In addition to socioeconomic class and genetic predisposition, megatrends such as climate  
14  
15 change, ageing and urbanisation are impacting asthma [2–4]. Even though asthma has been  
16  
17 considered as a single disease, recent studies have shown that it consists of multiple phenotypes [5].  
18  
19 Asthma varies considerably across the life course, and is different in adults and in children. Where  
20  
21 childhood asthma is characterized by a predominance of allergic multi-morbidity and higher  
22  
23 prevalence among boys, asthma in adults is associated with more respiratory symptoms and asthma  
24  
25 medications [6]. Risk factors for adult asthma are genetic predisposition, female gender,  
26  
27 overweight, allergies, upper airway diseases, and exposure to tobacco smoke or other irritants. [7]  
28  
29 The main adult asthma phenotypes that have been identified include (1) early-onset allergic asthma,  
30  
31 (2) early-onset allergic moderate-to-severe remodelled asthma, (3) late-onset nonallergic  
32  
33 eosinophilic asthma, and (4) late-onset nonallergic noneosinophilic asthma but overlap of  
34  
35 commonly reported asthma phenotypes has also been observed, with implications for objective  
36  
37 asthma outcomes [5,8]. Definition of “early-onset” varies by studies. A study investigating severe  
38  
39 asthma subgroups defined late-asthma onset as after the age of 12 years [9] where others refer to  
40  
41 early-onset adult asthma when the onset of asthma has been reported to be 12–15 years [10]. More  
42  
43 severe form of adult asthma is less stable than childhood-onset disease with more relapses and less  
44  
45 remissions, and associated with increased IgE, eosinophilia, poorer adherence to therapy, recurrent  
46  
47 infections, obesity, smoking, and low socioeconomic status [1,6]. Various classifications and  
48  
49 subgroups of phenotypes of asthma have been proposed but clear consensus has not been reached  
50  
51 among the scientific community. Heterogeneity of severe asthma phenotypes have led to the  
52  
53  
54  
55  
56  
57  
58  
59  
60

1  
2  
3 development of new asthma treatments targeting specific immune pathways, and although they may  
4 have limited utility among general asthma population, may they benefit a subset of patients with  
5 asthma [11].  
6  
7  
8  
9

10  
11 Studies have demonstrated that many comorbidities coexist with asthma and may even contribute to  
12 lower life expectancy [12]. We have previously detected increased all-cause mortality of asthmatics  
13 in the Finnish adult population, largely explained by development of chronic obstructive pulmonary  
14 disease in smoking asthmatics, malignant respiratory tract neoplasms, and cardiovascular diseases  
15  
16  
17  
18  
19  
20 [13].  
21  
22  
23  
24

25 In the Finnish population the most common comorbidities of adult asthma are hypertension,  
26 diabetes, severe psychiatric disorders and ischemic heart disease [14]. Other known asthma-related  
27 comorbidities include rhinitis, chronic sinusitis, gastroesophageal reflux disease, obstructive sleep  
28 apnea, hormonal disorders, obesity, hyperventilation, glottic dysfunction, and respiratory infections  
29  
30  
31  
32  
33 [15]. In a population-based cross-sectional study covering 1.4 million Scottish people,  
34 comorbidities associated with asthma in adults were chronic obstructive pulmonary disease,  
35 bronchiectasis, eczema/psoriasis, dyspepsia, depression and anxiety [16].  
36  
37  
38  
39  
40  
41  
42

43 Oral cavity is closely connected with the lower airways by anatomical location, functions such as in  
44 conducting and modifying inhaled air and speech. When it comes to oral health related diseases,  
45 asthma has previously been associated with herpes zoster, tooth decay, dental erosion, oral  
46 candidiasis, periodontal disease and psoriasis [16–23]. However, findings of the studies are  
47 controversial, and many other associations between asthma and oral diseases are less studied. There  
48  
49  
50  
51  
52  
53  
54  
55  
56  
57  
58  
59  
60 is a clear need for better understanding of co-morbid conditions and their impact on burden of  
asthma.



## Study aim

Aim of this cohort study was to investigate the hazard rate of oral manifesting diseases in asthmatic adults compared to non-asthmatic adults. We hypothesized that asthmatics have more oral manifesting diseases than non-asthmatics.

## METHODS

### Study design

This population-based matched cohort study with follow-up started with a questionnaire collected in 1997, in which questions about living environment, allergies, smoking duration and quantity, weight, and education level were asked from asthmatics and matched non-asthmatics. The questionnaire was sent to 4,958 people of which 3,792 responded. Altogether 1,394 asthmatics and 2,398 adults without asthma were included in this study. Follow-up data, all diagnose codes, of all responded participants were collected from the national hospital discharge registry of the National Institute for Health and Welfare from 1997 to 2014.

**Patient and Public Involvement:** Participants of the study were not involved in the planning of the study design. Extended data from the registers was collected with the approval of the National Institute for Health and Welfare. Results of the study are published only in peer-reviewed journals, no other information of the results of the study are provided to the participants.

**Ethics statement:** Approval for the study was obtained from the ethical committee at Tampere University Hospital (R15030) and a written consent was obtained from all subjects.

### Study population

1  
2  
3 Participants with asthma and without asthma were matched by sex, age ( $\pm 2$  years) and area of  
4 residence by postal code. Total of 1400 asthmatic adults were identified from the Drug  
5 Reimbursement Register of the Finnish Social Insurance Institution, as those who had a special drug  
6 reimbursement right due to asthma. Population register was used to identify 2800 matched non  
7 asthmatics. Altogether 248 asthmatics and 511 non asthmatics were recruited from the Mini Finland  
8 Health Survey [24]. All asthmatics fulfilled the criteria for doctor-diagnosed asthma: typical  
9 history, clinical features and asthma course, and lung function tests. Participants were over 30 years  
10 old (Table 1). Nearly 62 % were male and 38 % women. An estimate of the participants lifetime  
11 tobacco exposure at baseline was calculated in pack-years [25]. Body mass index was presented in  
12 four categories and level of education was divided into three categories based on the Finnish  
13 education system. The study population has previously been described in more detail [13].  
14  
15  
16  
17  
18  
19  
20  
21  
22  
23  
24  
25  
26  
27  
28  
29  
30  
31  
32  
33  
34  
35  
36  
37  
38  
39  
40  
41  
42  
43  
44  
45  
46  
47  
48  
49  
50  
51  
52  
53  
54  
55  
56  
57  
58  
59  
60

**Table 1** Baseline characteristics

|                                  | No asthma n (%) | Asthma n (%) | Missing (%) |
|----------------------------------|-----------------|--------------|-------------|
| <b>Sex</b>                       |                 |              |             |
| Men                              | 912 (38.0)      | 532 (38.2)   |             |
| Women                            | 1486 (62.0)     | 862 (61.8)   |             |
| Total                            | 2398            | 1394         |             |
| <b>Age at baseline</b>           |                 |              |             |
| ≤59                              | 1506 (62.8)     | 893 (64.1)   |             |
| 60–69                            | 699 (29.1)      | 401 (28.8)   |             |
| 70–79                            | 166 (6.9)       | 84 (6.0)     |             |
| ≥ 80                             | 27 (1.1)        | 16 (1.1)     |             |
| <b>Pack-years</b>                |                 |              | 6.7         |
| 0                                | 1286 (57.1)     | 625 (48.6)   |             |
| ≤19                              | 595 (26.4)      | 389 (30.2)   |             |
| ≥ 20                             | 371 (16.5)      | 273 (21.2)   |             |
| <b>BMI (kg x m<sup>-2</sup>)</b> |                 |              | 2.4         |
| Underweight (<18.5)              | 26 (1.1)        | 19 (1.4)     |             |
| Normal (18.5-24.99)              | 998 (42.6)      | 463 (34.0)   |             |
| Overweight (25-29.99)            | 958 (40.9)      | 577 (42.4)   |             |
| Obese (≥ 30)                     | 358 (15.3)      | 303 (22.2)   |             |
| <b>Education level</b>           |                 |              | 2.2         |
| Matriculation exam.              | 435 (18.5)      | 187 (13.8)   |             |
| Secondary school                 | 560 (23.8)      | 322 (23.7)   |             |
| Primary school or less           | 1356 (57.7)     | 850 (62.5)   |             |

Lifetime tobacco exposure was calculated in pack-years (number of cigarettes per day/20 x number of years smoked, where 1 pipe = 2.5 cigarettes, 1 cigar = 4 cigarettes) based on which the individuals were divided into three groups: 0, ≤19, and ≥20 pack-years

Body mass index (BMI) assessed as weight in kilograms divided by the square of the height in meters was presented in four categories according to World Health Organization classification

Level of education was obtained by the questionnaire and divided based on Finnish education system into three categories: matriculation examination (13 years, reference value), secondary school or equivalent (9 years), and primary school or less (≤6 years)

## Outcomes

In this study we focused on oral diseases and diagnoses that can manifest in the oral cavity. The diagnoses were identified from the data on hospital visits and hospitalizations obtained from the

1  
2  
3 national hospital discharge registry of the National Institute for Health and Welfare from 1997 to  
4  
5 2014. Only main diagnoses were retrieved using codes of International Classification of Diseases  
6  
7 (ICD-10), and were divided into five disease groups: infections, malign neoplasms, benign  
8  
9 neoplasms, dental diseases, and dermatological diseases. The first group consisted of viral and  
10  
11 fungal infections (herpes simplex (B00.1), herpes zoster (B02), hand, foot and mouth disease  
12  
13 (B08.4), herpangina (B08.5), HIV disease resulting in candidiasis (B20.4), Kaposi sarcoma (B21.0),  
14  
15 Burkitt lymphoma (B21.1), mumps (B26.9), Epstein-Barr (B27.0), candidiasis (B37), and tonsillar  
16  
17 aspergillosis (B44.2). Malign neoplasms group consisted of malignant neoplasms of lip, oral cavity  
18  
19 and pharynx (C00-C14, malignant melanoma of lip (C43.0), and basal cell carcinoma of lip  
20  
21 (C44.0). Benign neoplasms included benign tumors (D00.0, D03.0, D03.3), in situ neoplasms  
22  
23 (D23.0), and other benign neoplasms of lip, oral cavity, pharynx or bone of skull and face (D10,  
24  
25 D11, D16.4, D16.5, D37.0). Dental diseases included diseases of oral cavity, salivary glands and  
26  
27 jaws (K00–K14). The last group included dermatological diseases (pemphigus L10), pemphigoid  
28  
29 (L12), dermatitis herpetiformis (L13.0), psoriasis (L40), and lichen planus (L43).

30  
31 We used one year wash-out period from the start of follow-up in 1997 to identify and exclude those  
32  
33 with pre-existing diseases of interest. For each outcome of interest, those eligible for follow-up  
34  
35 (e.g. without diagnoses during wash-out period) were followed up to the first occurrence defined as  
36  
37 the first hospital visit/hospitalization with diagnosis of interest, death or end of follow-up (31<sup>st</sup>  
38  
39 December 2014).

## 50 51 **Statistical analyses**

52  
53 We assessed and reported the incidence of the diseases of interest. Cox's proportional hazards  
54  
55 models stratified by matching unit (sex, age and area of residence by postal code), and models  
56  
57 matched and adjusted for smoking, education level, and body mass index (when possible), were  
58  
59  
60

1  
2  
3 used to evaluate the matched and additionally adjusted hazard ratios (HR) of diseases between  
4  
5 asthmatic and non-asthmatic groups. Each comorbidity was modelled separately. The differences in  
6  
7 comorbidity-free survival between asthmatics and non-asthmatics were also assessed by plotting the  
8  
9 Kaplan-Meier survival curves and performing log-rank tests. P-values <.05 were considered  
10  
11 statistically significant. All data analyses were performed with version 3.6.1 of R statistical  
12  
13 software [26].  
14  
15  
16  
17  
18  
19

## 20 RESULTS

21  
22 Mean follow-up period was 13.8 years. Total of 58,113 person years accumulated for 3,792  
23  
24 persons. Risk of having an any oral health related disease was increased among asthmatics  
25  
26 (matched HR 1.61, 95% confidence interval (CI) 1.24–2.10, P<0.001, Table 2), and Kaplan-Meier  
27  
28 plot (Figure 1) showed a clear difference between the asthmatic and non-asthmatic group. Result  
29  
30 remained significant after adjusting for pack-years, education level and body mass index (HR 1.41,  
31  
32 1.11–1.80, P=0.001).  
33  
34  
35  
36  
37

38 Only a few cases of candidiasis and herpes simplex infections were recorded in the first  
39  
40 comorbidity group. As it consisted mostly of herpes zoster, we decided to calculate the HR for  
41  
42 herpes zoster cases only. Hazard rate of herpes zoster was nearly seven times more common in the  
43  
44 asthmatic group (matched HR 6.94, 1.50–32.1, P<0.05) compared to non-asthmatics. After  
45  
46 adjusting for pack-years, the association persisted (adjusted HR 6.18, 1.21–31.6, P<0.05). Benign  
47  
48 tumors were 1.5-fold more common among asthmatics (matched HR 1.94, 1.05–3.56, P<0.05).  
49  
50 Most common benign tumors in the head area were neoplasms of inner mouth and tumors of parotid  
51  
52 gland and other major salivary glands.  
53  
54  
55  
56  
57  
58  
59  
60

1  
2  
3 Asthma was not significantly associated with increased hazard rate of malignant neoplasm of lip,  
4 oral cavity or pharynx (matched HR 2.33, 0.91–5.99, P=0.080). Cancers of lip, oral cavity or  
5 pharynx as well as melanoma or basal cell carcinoma of lip were recorded. Hazard rate of non-  
6 neoplastic conditions of head and neck region, diseases of oral cavity, salivary glands and jaws was  
7 not significantly increased among asthmatics (HR 1.21, 0.84–1.73, P=0.059). Dental diseases  
8 grouped together such as caries, chronic apical periodontitis and periapical abscess were not  
9 significantly associated with adult asthma neither in univariate analysis (matched HR 1.21, 0.84–  
10 1.73, P=0.307) nor after adjustment (HR=1.40, 0.93–2.12). Matched HR for dental caries solely  
11 was 2.13, 0.90–5.05, P=0.085.  
12  
13  
14  
15  
16  
17  
18  
19  
20  
21  
22  
23  
24  
25

26 We finally observed dermatological diseases that may have oral manifestations and found that the  
27 investigated diseases associated with asthma in the matched cohort (matched HR 1.67, 1.01–2.78,  
28 P=0.048) but after after adjusting for pack-years, education level and body mass index the  
29 association attenuated (adjusted HR 1.72, 0.85–3.47, P=0.129). Psoriasis and lichen planus were the  
30 most common skin diseases with 89% representation of all studied skin diseases among asthmatic  
31 adults (Table 3). Among adults without asthma, psoriasis and lichen planus comprised 77% of all  
32 skin diseases investigated in this study. Other dermatological diseases found were pemphigus,  
33 pemphigoid and dermatitis herpetiformis.  
34  
35  
36  
37  
38  
39  
40  
41  
42  
43  
44  
45  
46  
47  
48  
49  
50  
51  
52  
53  
54  
55  
56  
57  
58  
59  
60

**Table 2** Comparing the non-asthmatic and asthma groups in respect with oral comorbidities. Hazard ratios based on Cox's proportional hazards regression. In the first model only matching is taken into account as strata. The second model is matched and adjusted by background variables.

|                                |           | 10 000 person-years | Events | Rate (95% CI) per 10 000 person-years | Matched HR (95% CI)     | Adjusted HR (95% CI)     |
|--------------------------------|-----------|---------------------|--------|---------------------------------------|-------------------------|--------------------------|
| <b>Any oral disease</b>        | No asthma | 33.46               | 165    | 4.93 (4.21–5.74)                      | 1                       | 1                        |
|                                | Asthma    | 18.41               | 136    | 7.39 (6.20–8.74)                      | <b>1.61 (1.24–2.10)</b> | <b>1.41 (1.11–1.80)*</b> |
| <b>Herpes zoster</b>           | No asthma | 34.72               | 4      | 0.11 (0.03–0.29)                      | 1                       | 1                        |
|                                | Asthma    | 19.51               | 14     | 0.72 (0.39–1.20)                      | <b>6.94 (1.50–32.1)</b> | <b>6.18 (1.21–31.6)†</b> |
| <b>Malign neoplasms</b>        | No asthma | 34.66               | 11     | 0.32 (0.16–0.57)                      | 1                       | 1                        |
|                                | Asthma    | 19.52               | 13     | 0.67 (0.35–1.14)                      | 2.33 (0.91–5.99)        | 2.13 (0.72–6.34)†        |
| <b>Benign neoplasms</b>        | No asthma | 34.53               | 28     | 0.81 (0.54–1.17)                      | 1                       | 1                        |
|                                | Asthma    | 19.41               | 25     | 1.29 (0.83–1.90)                      | <b>1.94 (1.05–3.56)</b> | 1.64 (0.81–3.33)††       |
| <b>Dental diseases</b>         | No asthma | 34.02               | 96     | 2.82 (2.29–3.45)                      | 1                       | 1                        |
|                                | Asthma    | 19.03               | 66     | 3.47 (2.68–4.41)                      | 1.21 (0.84–1.73)        | 1.40 (0.93–2.12)††       |
| <b>Dermatological diseases</b> | No asthma | 34.35               | 42     | 1.22 (0.88–1.65)                      | 1                       | 1                        |
|                                | Asthma    | 19.19               | 36     | 1.88 (1.31–2.60)                      | <b>1.67 (1.01–2.78)</b> | 1.72 (0.85–3.47)*        |

Matched HR = participants with asthma and without asthma are only matched for sex, age and area of residence by postal code.

Adjusted HRs:

\* Matched for sex, age and area of residence by postal code and adjusted for pack-years, education level and body mass index.

† Matched for sex, age and area of residence by postal code and adjusted for pack-years.

†† Matched for sex, age and area of residence by postal code and adjusted for pack-years and education level.

Bold values denote statistical significance at the  $p < 0.05$  level.

**Table 3** Frequency of oral diagnoses

|                                                            | No asthma | Asthma |
|------------------------------------------------------------|-----------|--------|
| <b>Virus infections</b>                                    |           |        |
| Herpes Zoster (B02)                                        | 4         | 14     |
| Other virus infections (B00, B37)                          | 3         | 1      |
| <b>Oral cancer</b>                                         |           |        |
| Lip, oral cavity and pharynx (C00-C02, C04, C10, C13, C14) | 7         | 11     |
| Melanoma or basal cell carcinoma of lip (C44)              | 4         | 3      |
| <b>Benign tumors</b>                                       |           |        |
| Mouth and pharynx (D10)                                    | 14        | 16     |
| Major salivary glands (D11)                                | 8         | 8      |
| Other benign tumors (D03, D23, D37)                        | 7         | 2      |
| <b>Dental diseases</b>                                     |           |        |
| Dental caries (K01, K02)                                   | 16        | 21     |
| Diseases of salivary glands (K11)                          | 16        | 15     |
| Stomatitis and related lesions (K12)                       | 6         | 5      |
| Diseases of lip and oral mucosa (K13)                      | 17        | 8      |
| Diseases of tongue (K14)                                   | 8         | 5      |
| Other dental diseases (K03, K04, K10)                      | 33        | 14     |
| <b>Dermatological diseases</b>                             |           |        |
| Psoriasis (L40)                                            | 21        | 22     |
| Lichen planus (L43)                                        | 13        | 12     |
| Pemphigus (L10)                                            | 1         | 0      |
| Pemphigoid (L12)                                           | 4         | 3      |
| Dermatitis herpetiformis (L13.0)                           | 5         | 1      |

## DISCUSSION

In this population-based cohort study, the hazard rate of being diagnosed with an oral manifesting disease was increased among asthmatics. The differences in the hazard rate of infections, benign neoplasms and dermatological diseases contributed to the overall increase. The hazard of benign oral tumors (including benign salivary gland tumors) was 1.5-fold, and of virus infection, herpes zoster, was nearly seven times higher among asthmatic adults as compared to non-asthmatic adults.



1  
2  
3 Dermatological diseases, mainly psoriasis and lichen planus, associated with asthma in the matched  
4 cohort but hazard was not significant in the adjusted model.  
5  
6  
7  
8  
9

10 We observed an increased hazard rate of herpes zoster among asthmatic adults. A 8-year follow-up  
11 study made in Taiwan with over 40,000 newly diagnosed, adult asthmatics with age- and sex-  
12 matched non-asthmatics discovered that the risk of herpes zoster infection was 1.48-fold in the  
13 asthma group [27]. Herpes zoster infection in the intraoral region is classically seen as unilateral  
14 dermatomal rash with maculopapular appearance, preceded with hard, neuropathic pain [28,29]. It  
15 is caused by the reactivation of Varicella Zoster Virus, and may occur spontaneously or due to  
16 immune system deficiency. The respiratory viruses associated with asthma exacerbations include  
17 respiratory syncytial virus (RSV), influenza viruses, and human rhinoviruses, as well as  
18 coronaviruses, parainfluenza viruses, adenoviruses and more recently found metapneumoviruses  
19 and bocaviruses [30,31]. It is assumed that age-related decline in immune function and coexistent  
20 viral infection promotes persistent chronic inflammation of airways [32].  
21  
22  
23  
24  
25  
26  
27  
28  
29  
30  
31  
32  
33  
34  
35  
36  
37

38 We have previously shown a higher all-cause mortality of adult asthmatics, which was largely  
39 explained by the development of chronic obstructive pulmonary disease, malignant respiratory tract  
40 neoplasms, and cardiovascular diseases [13]. Although highly lethal in general, we did not detect  
41 increased mortality of oral cancer among asthmatics in our previous study, putatively due to its low  
42 incidence compared to other death causes of asthmatics and controls. In line with our previous  
43 findings, asthma was not significantly associated with malignant neoplasms of oral cavity or  
44 pharynx in the present study.  
45  
46  
47  
48  
49  
50  
51  
52  
53  
54  
55  
56  
57  
58  
59  
60

1  
2  
3 The results of our study suggested that the hazard rate of benign oral tumors could be increased  
4 among asthmatic adults compared to non-asthmatic adults. To our knowledge, the possible association  
5 between benign oral tumors and asthma has not been studied before. Plausible explanation for  
6 decreased salivary flow might be the use of  $\beta_2$ -agonists [33].  
7  
8  
9  
10  
11  
12

13  
14 We detected that dental diseases (diseases including tooth decay, chronic apical periodontitis,  
15 sialadenitis and diseases of periodontal tissue) were not significantly associated with adult asthma.  
16  
17 However, our data do not include oral status information routinely collected in the primary care,  
18 and therefore no conclusions about the incidence of for example tooth decay or periodontitis cannot  
19 be made from these data. According to a meta-analysis and systematic review including 18 studies,  
20 asthma roughly doubles the risk of dental caries in both primary and permanent dentition [17].  
21  
22 Plausible mechanisms contributing to tooth decay are decreased saliva secretion rate and decreased  
23 salivary pH due to inhaled  $\beta_2$ -agonists and corticosteroids, dry powder inhalers containing lactose  
24 monohydrate and increase in *Lactobacilli* and *Streptococcus mutans* in the oral cavity [17,21]. It  
25 could be speculated that increased caries risk found in other studies might also be related to  
26 decreased biodiversity of oral cavity and aberrant immunity of asthmatics, yet further studies are  
27 warranted.  
28  
29  
30  
31  
32  
33  
34  
35  
36  
37  
38  
39  
40  
41  
42  
43  
44

45 In our study dermatological diseases that may have oral manifestations were more common among  
46 asthmatics. Psoriasis is an immune-mediated, genetic skin and joint disease typically characterized  
47 with erythematous plaques with silvery scales [23]. Recent meta-analysis indicated that patients  
48 with psoriasis have an increased risk of asthma, especially in older patient groups [22]. Oral  
49 manifestations of psoriasis include lesions of small, whitish papules, red and white plaques that  
50 follow skin lesions, and bright red patches, all which may also be associated with angular cheilitis,  
51 geographic tongue lesions and fissured tongue [34]. Whether psoriasis can manifest solely in the  
52  
53  
54  
55  
56  
57  
58  
59  
60

1  
2  
3  
4  
5  
6  
7  
8  
9  
10  
11  
12  
13  
14  
15  
16  
17  
18  
19  
20  
21  
22  
23  
24  
25  
26  
27  
28  
29  
30  
31  
32  
33  
34  
35  
36  
37  
38  
39  
40  
41  
42  
43  
44  
45  
46  
47  
48  
49  
50  
51  
52  
53  
54  
55  
56  
57  
58  
59  
60

oral mucosa has been a matter of debate for years. The benefits of relatively large matched cohort set up in our study allowed to detect also connections between rare diseases such as autoimmune diseases.

Based on genome-wide association studies, both asthma and autoimmune diseases are associated with several single-nucleotide polymorphisms (SNPs) in the human 17q12-21 locus [35]. Although rare and difficult to diagnose, some case reports suggest there is an intraoral form of psoriasis. [36] Studies have shown shared genetic variants of asthma and autoimmune diseases [4], which could reflect increased co-existence of asthma and psoriasis compared to controls. Asthma and psoriasis also have shared comorbidities such as cardiovascular diseases, depression, diabetes and obesity [37].

In line with our findings of psoriasis, another autoimmune disease, lichen planus, was among the most common dermatological diseases among asthmatics in our study. Clinical features of oral lichen planus typically include pain and burning in the mouth induced by spicy or acid foods due to lesions in the mucosa. Clinical presentations of oral lichen planus are reticular, erosive, plaque-like, and bullous, which all can occur individually or in combination. Frequently asymptomatic, reticular oral lichen planus is however the most common type [38]. To our knowledge, there are no previous studies concerning the association between lichen planus and asthma.

This study has several strengths and limitations. The strengths of this study include the population-based, matched cohort set up and the fact that asthma diagnosis was confirmed with lung function tests. The study also benefits from the long follow-up time. Limitation of the study is the lack of data of primary care, where common dental problems such as dental caries are usually treated. We used hazard ratios to measure the difference between asthmatic and non-asthmatic groups.

1  
2  
3 However, using HR, roughly interpreted as the incidence rate ratio, is not totally unproblematic.  
4  
5 Use of HR with a causal interpretation is risky because of two things: the HR may change over  
6  
7 time, and the HR has a built-in selection bias. [39]. We acknowledge the possibility of detection  
8  
9 bias due to the more intensive use of healthcare services by asthmatics (and people with any  
10  
11 moderate to severe chronic disease) than non-asthmatic subjects, which could have affected the  
12  
13 results. For some of the comorbidities, uncertainty (wide confidence intervals) regarding the  
14  
15 magnitudes of the observed relative differences and limited statistical power precluding of  
16  
17 observing potentially existing associations, should be taken into account, when interpreting the  
18  
19 results of our study.  
20  
21  
22  
23  
24  
25

26 One of the most common oral health problems, periodontitis, has a two-way relationship with  
27  
28 diabetes mellitus, and is presumably associated with severe asthma in adults [40,41]. Periodontitis  
29  
30 is diagnosed and mostly treated in the primary care. Incidence of this chronic inflammatory disease  
31  
32 of tissues surrounding the teeth cannot thus be investigated from this data. Clinical features of the  
33  
34 cases were not available due to register-based study design. In cases of herpes zoster and psoriasis,  
35  
36 ICD-10 coding does not separate anatomical sites of disease manifestation. However, to our  
37  
38 knowledge the incidence of oral manifestations of these diseases is not clear, and it is therefore  
39  
40 important to take each case into account.  
41  
42  
43  
44  
45

## 46 **CONCLUSIONS**

47  
48 Risk of having an oral manifesting disease was increased among adult asthmatics. Viral and fungal  
49  
50 infections were the most common oral disease among asthmatics but also risk of having a benign  
51  
52 tumor, or dermatological disease was increased among adult asthmatics. These results emphasize  
53  
54 the significance of good oral care in asthmatics. Identifying the most common asthma related oral  
55  
56  
57  
58  
59  
60

1  
2  
3 diseases may result in early diagnosis and better management of comorbid conditions and overall  
4 health of asthmatics.  
5  
6  
7  
8  
9

10 **Contributorship statement:** R. Lemmetyinen, S. Toppila-Salmi, J. Karjalainen, and J. Haukka  
11 contributed to data acquisition, analysis, interpretation, and design, and revised the manuscript for  
12 critical intellectual content. A. But, R. Renkonen, and J. Pekkanen critically revised the manuscript.  
13  
14 All authors agree to be accountable for all aspects of the work.  
15  
16  
17  
18  
19  
20

21 **Competing interests:** None declared.  
22  
23  
24  
25

26 **Funding:** This study was supported by the grants from The Finnish Allergy Research Foundation,  
27 Finnish Association of Otorhinolaryngology and Head and Neck Surgery, Finnish Medical  
28 Foundation, The Finnish Society of Allergology and Immunology, Foundation of the Finnish Anti-  
29 Tuberculosis Association, Jane and Aatos Erkko Foundation, Paulo Foundation, The Research  
30 Foundation of the Pulmonary Diseases, Tampere Tuberculosis Foundation, Väinö and Laina Kivi  
31 Foundation, Yrjö Jahnsson Foundation, and Rehabilitation Funds of the Finnish Social Insurance  
32 Institution. We thank the following people for their valuable contributions: Professor Arpo Aromaa,  
33 MSc Heini Huhtala, Professor Timo Klaukka †, and Professor Markku M. Nieminen.  
34  
35  
36  
37  
38  
39  
40  
41  
42  
43  
44  
45  
46

47 **Data sharing statement:** The data that support the findings of this study are  
48 available from Statistics Finland, and the National Institute for Health and Welfare, but restrictions  
49 apply to the availability of these data, which were used under licence for the current study, and so  
50 are not publicly available. Data are, however, available from the authors upon reasonable request  
51 and with permission of Statistics Finland, and the National Institute for Health and Welfare.  
52  
53  
54  
55  
56  
57  
58  
59  
60

**Figure 1 legend: Figure 1** Kaplan-Meier survival curve showing the difference in oral health related diseases between asthmatics and non-asthmatics. P-value by log-rank test.

## REFERENCES

- 1 Papi A, Brightling C, Pedersen SE, *et al.* Asthma. *Lancet*. 2018;**391**:783–800. doi:10.1016/S0140-6736(17)33311-1
- 2 Lundbäck B, Backman H, Lötvall J, *et al.* Is asthma prevalence still increasing? *Expert Rev Respir Med* 2016;**10**:39–51. doi:10.1586/17476348.2016.1114417
- 3 D'amato M, Cecchi L, Annesi-Maesano I, *et al.* News on climate change, air pollution, and allergic triggers of asthma. *J Investig Allergol Clin Immunol* 2018;**28**:91–7. doi:10.18176/jiaci.0228
- 4 Das S, Miller M, Broide DH. Chromosome 17q21 Genes ORMDL3 and GSDMB in Asthma and Immune Diseases. *Adv Immunol* 2017;**135**:1–52. doi:10.1016/BS.AI.2017.06.001
- 5 Kaur R, Chupp G. Phenotypes and endotypes of adult asthma: Moving toward precision medicine. *J Allergy Clin Immunol* 2019;**144**:1–12. doi:10.1016/j.jaci.2019.05.031
- 6 Turner S, Elnazir B, Preutthipan A, *et al.* Asthma in Children and Adults-What Are the Differences and What Can They Tell us About Asthma? *Front Pediatr* | [www.frontiersin.org](http://www.frontiersin.org) 2019;**1**:256. doi:10.3389/fped.2019.00256
- 7 de Nijs SB, Venekamp LN, Bel EH. Adult-onset asthma: Is it really different? *Eur. Respir. Rev.* 2013;**22**:44–52. doi:10.1183/09059180.00007112
- 8 Amaral R, Fonseca JA, Jacinto T, *et al.* Having concomitant asthma phenotypes is common and independently relates to poor lung function in NHANES 2007-2012. *Clin Transl Allergy* 2018;**8**:13. doi:10.1186/s13601-018-0201-3
- 9 Moore WC, Meyers DA, Wenzel SE, *et al.* Identification of Asthma Phenotypes Using Cluster Analysis in the Severe Asthma Research Program. *Am J Respir Crit Care Med* 2010;**181**:315–23. doi:10.1164/rccm.200906-0896OC
- 10 Haldar P, Pavord ID, Shaw DE, *et al.* Cluster Analysis and Clinical Asthma Phenotypes. *Am J Respir Crit Care Med* 2008;**178**:218–24. doi:10.1164/rccm.200711-1754OC
- 11 Schoettler N, Strek ME. Recent Advances in Severe Asthma: From Phenotypes to Personalized Medicine. *Chest*. 2020;**157**:516–28. doi:10.1016/j.chest.2019.10.009
- 12 Veenendaal M, Westerik JAM, van den Bemt L, *et al.* Age- and sex-specific prevalence of chronic comorbidity in adult patients with asthma: A real-life study. *npj Prim Care Respir Med* 2019;**29**:14. doi:10.1038/s41533-019-0127-9
- 13 Lemmetyinen R, Karjalainen J, But A, *et al.* Higher mortality of adults with asthma: A 15-year follow-up of a population-based cohort. *Allergy Eur J Allergy Clin Immunol* 2018;**73**:1479–88. doi:10.1111/all.13431

1  
2  
3  
4  
5  
6  
7  
8  
9  
10  
11  
12  
13  
14  
15  
16  
17  
18  
19  
20  
21  
22  
23  
24  
25  
26  
27  
28  
29  
30  
31  
32  
33  
34  
35  
36  
37  
38  
39  
40  
41  
42  
43  
44  
45  
46  
47  
48  
49  
50  
51  
52  
53  
54  
55  
56  
57  
58  
59  
60

- 14 Kauppi P, Linna M, Jantunen J, *et al.* Chronic comorbidities contribute to the burden and costs of persistent asthma. *Mediators Inflamm* 2015;**2015**. doi:10.1155/2015/819194
- 15 Boulet LP, Boulay MÈ. Asthma-related comorbidities. *Expert Rev. Respir. Med.* 2011;**5**:377–93. doi:10.1586/ers.11.34
- 16 Weatherburn CJ, Guthrie B, Mercer SW, *et al.* Comorbidities in adults with asthma: Population-based cross-sectional analysis of 1.4 million adults in Scotland. *Clin Exp Allergy* 2017;**47**:1246–52. doi:10.1111/cea.12971
- 17 Alavaikko S, Jaakkola MS, Tjäderhane L, *et al.* Asthma and caries: A systematic review and meta-analysis. *Am J Epidemiol* 2011;**174**:631–41. doi:10.1093/aje/kwr129
- 18 Jin Kwon H, Won Bang D, Na Kim E, *et al.* Asthma as a risk factor for zoster in adults: A population-based case-control study. *J Allergy Clin Immunol* 2016;**137**:1406–12. doi:10.1016/j.jaci.2015.10.032
- 19 Lønnberg AS, Skov L, Skytthe A, *et al.* Asthma in patients with psoriasis. *Br J Dermatol* 2015;**172**:1660–1. doi:10.1111/bjd.13637
- 20 Nair P, Gharote H, Singh P, *et al.* Herpes zoster on the face in the elderly. *BMJ Case Rep* 2014;**2014**. doi:10.1136/bcr-2013-200101
- 21 Thomas MS, Parolia A, Kundabala M, *et al.* Asthma and oral health: a review. *Aust Dent J* 2010;**55**:128–33. doi:10.1111/j.1834-7819.2010.01226.x
- 22 Wang J, Ke R, Shi W, *et al.* Association between psoriasis and asthma risk: A meta-analysis. *Allergy asthma Proc* 2018;**39**:103–9. doi:10.2500/aap.2018.39.4109
- 23 Boehncke W-H, Schön MP. Psoriasis. *Lancet* 2015;:983–94. doi:10.1007/978-3-319-59963-2\_4
- 24 Pasternack R, Huhtala H, Karjalainen J. Chlamydophila (Chlamydia) pneumoniae serology and asthma in adults: A longitudinal analysis. *J Allergy Clin Immunol* 2005;**116**:1123–8. doi:10.1016/j.jaci.2005.08.030
- 25 Definition of pack year - NCI Dictionary of Cancer Terms - National Cancer Institute. 2011. <https://www.cancer.gov/publications/dictionaries/cancer-terms/def/pack-year> (accessed 12 Apr 2021).
- 26 R Core Team. R Core Team (2019). R: A language and environment for statistical computing. 2019. <https://www.r-project.org/>.
- 27 Peng Y-H, Fang H-Y, Wu B-R, *et al.* Adult asthma is associated with an increased risk of herpes zoster: A population-based cohort study. *J Asthma* 2017;**54**:250–7. doi:10.1080/02770903.2016.1211142
- 28 John AR, Canaday DH. Herpes Zoster in the Older Adult. *Infect. Dis. Clin. North Am.* 2017;**31**:811–26. doi:10.1016/j.idc.2017.07.016
- 29 Mortazavi H, Safi Y, Baharvand M, *et al.* Diagnostic Features of Common Oral Ulcerative Lesions: An Updated Decision Tree. *Int. J. Dent.* 2016;**2016**. doi:10.1155/2016/7278925



- 1  
2  
3 30 Edwards MR, Strong K, Cameron A, *et al*. Viral infections in allergy and immunology: How  
4 allergic inflammation influences viral infections and illness. *J. Allergy Clin. Immunol.*  
5 2017;**140**:909–20. doi:10.1016/j.jaci.2017.07.025  
6  
7  
8 31 Makris S, Johnston S. Recent advances in understanding rhinovirus immunity [version 1;  
9 peer review: 4 approved]. *F1000Research*. 2018;**7**. doi:10.12688/F1000RESEARCH.15337.1  
10  
11 32 Hirano T, Matsunaga K. Late-onset asthma: current perspectives. *J Asthma Allergy*  
12 2018;**11**:1–9. doi:10.2147/JAA.S125948  
13  
14 33 Lenander-Lumikari M, Laurikainen K, Kuusisto P, *et al*. Stimulated salivary flow rate and  
15 composition in asthmatic and non- asthmatic adults. *Arch Oral Biol* 1998;**43**:151–6.  
16 doi:10.1016/S0003-9969(97)00110-6  
17  
18 34 Dreyer LN, Brown GC. Oral manifestations of psoriasis. Clinical presentation and  
19 management. *N Y State Dent J* 2012;**78**:14–  
20 8.<http://www.ncbi.nlm.nih.gov/pubmed/22803270>  
21  
22  
23 35 Ustiugova AS, Korneev K V, Kuprash D V, *et al*. Functional SNPs in the Human  
24 Autoimmunity-Associated Locus 17q12-21. *Genes (Basel)* 2019;**10**.  
25 doi:10.3390/genes10020077  
26  
27 36 Mattsson U, Warfvinge G, Jontell M. Oral psoriasis - A diagnostic dilemma: A report of two  
28 cases and a review of the literature. *Oral Surg Oral Med Oral Pathol Oral Radiol*  
29 2015;**120**:e183–9. doi:10.1016/j.oooo.2015.03.005  
30  
31  
32 37 Takeshita J, Grewal S, Langan SM, *et al*. Psoriasis and comorbid diseases: Epidemiology. *J*  
33 *Am Acad Dermatol* 2017;**76**:377–90. doi:10.1016/j.jaad.2016.07.064  
34  
35 38 Sankar V, Noujeim M. Oral Manifestations of Autoimmune and Connective Tissue  
36 Disorders. *Atlas Oral Maxillofac Surg Clin NA* 2017;**25**:113–26.  
37 doi:10.1016/j.cxom.2017.04.004  
38  
39 39 Hernán MA. The Hazards of Hazard Ratios. *Epidemiology* 2010;**21**:13.  
40 doi:10.1097/EDE.0B013E3181C1EA43  
41  
42  
43 40 Zhou X, Zhang W, Liu X, *et al*. Interrelationship between diabetes and periodontitis: Role of  
44 hyperlipidemia. *Arch Oral Biol* 2015;**60**:667–74.  
45 doi:10.1016/J.ARCHORALBIO.2014.11.008  
46  
47 41 Soledade-Marques KR, Gomes-Filho IS, da Cruz SS, *et al*. Association between periodontitis  
48 and severe asthma in adults: A case-control study. *Oral Dis* 2018;**24**:442–8.  
49 doi:10.1111/odi.12737  
50  
51  
52  
53  
54  
55  
56  
57  
58  
59  
60



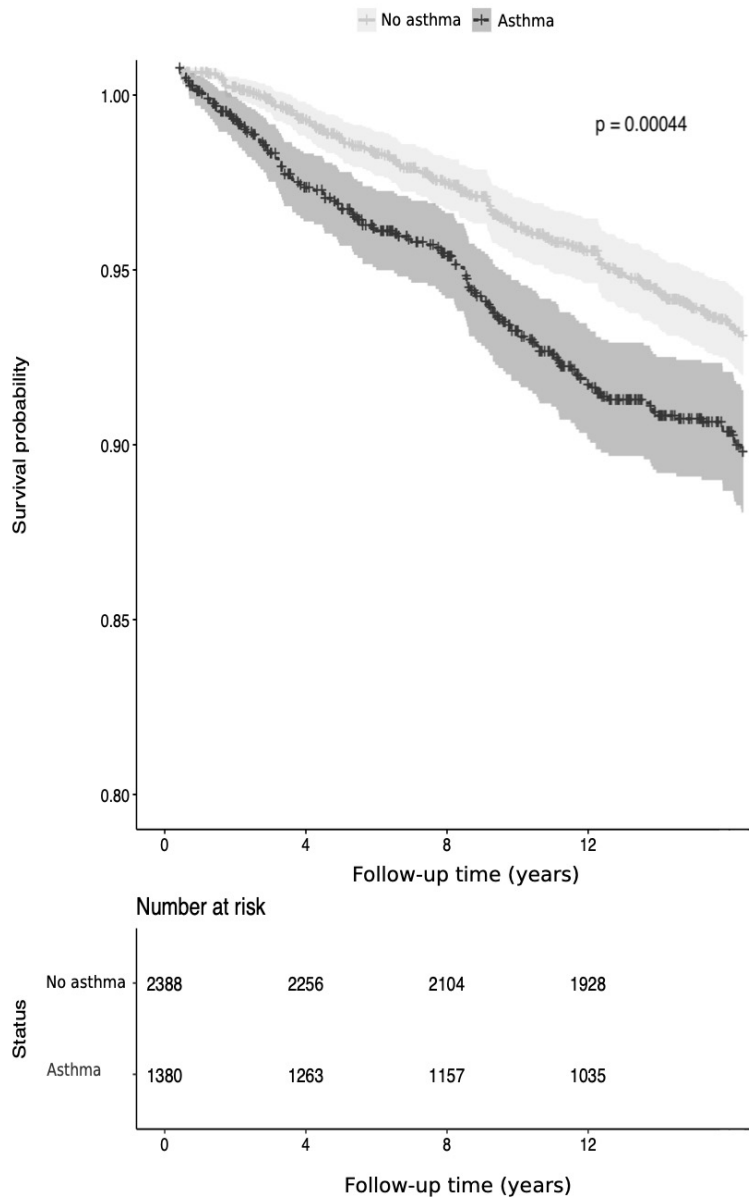

Figure 1 Kaplan–Meier survival curve of the difference in oral health–related diseases amongst asthmatics and nonasthmatics. P-value for the log-rank test.

366x457mm (72 x 72 DPI)

## STROBE (Strengthening The Reporting of OBServational Studies in Epidemiology) Checklist

A checklist of items that should be included in reports of observational studies. You must report the page number in your manuscript where you consider each of the items listed in this checklist. If you have not included this information, either revise your manuscript accordingly before submitting or note N/A.

**Note:** An Explanation and Elaboration article discusses each checklist item and gives methodological background and published examples of transparent reporting. The STROBE checklist is best used in conjunction with this article (freely available on the Web sites of PLoS Medicine at <http://www.plosmedicine.org/>, Annals of Internal Medicine at <http://www.annals.org/>, and Epidemiology at <http://www.epidem.com/>). Information on the STROBE Initiative is available at [www.strobe-statement.org](http://www.strobe-statement.org).

| Section and Item     | Item No. | Recommendation                                                                                                                                                                                                                                                                                                                                                                                                                                                                 | Reported on Page No. |
|----------------------|----------|--------------------------------------------------------------------------------------------------------------------------------------------------------------------------------------------------------------------------------------------------------------------------------------------------------------------------------------------------------------------------------------------------------------------------------------------------------------------------------|----------------------|
| Title and Abstract   | 1        | (a) Indicate the study's design with a commonly used term in the title or the abstract                                                                                                                                                                                                                                                                                                                                                                                         |                      |
|                      |          | (b) Provide in the abstract an informative and balanced summary of what was done and what was found                                                                                                                                                                                                                                                                                                                                                                            |                      |
| <b>Introduction</b>  |          |                                                                                                                                                                                                                                                                                                                                                                                                                                                                                |                      |
| Background/Rationale | 2        | Explain the scientific background and rationale for the investigation being reported                                                                                                                                                                                                                                                                                                                                                                                           |                      |
| Objectives           | 3        | State specific objectives, including any prespecified hypotheses                                                                                                                                                                                                                                                                                                                                                                                                               |                      |
| <b>Methods</b>       |          |                                                                                                                                                                                                                                                                                                                                                                                                                                                                                |                      |
| Study Design         | 4        | Present key elements of study design early in the paper                                                                                                                                                                                                                                                                                                                                                                                                                        |                      |
| Setting              | 5        | Describe the setting, locations, and relevant dates, including periods of recruitment, exposure, follow-up, and data collection                                                                                                                                                                                                                                                                                                                                                |                      |
| Participants         | 6        | (a) <i>Cohort study</i> —Give the eligibility criteria, and the sources and methods of selection of participants. Describe methods of follow-up<br><br><i>Case-control study</i> —Give the eligibility criteria, and the sources and methods of case ascertainment and control selection. Give the rationale for the choice of cases and controls<br><br><i>Cross-sectional study</i> —Give the eligibility criteria, and the sources and methods of selection of participants |                      |
|                      |          | (b) <i>Cohort study</i> —For matched studies, give matching criteria and number of exposed and unexposed<br><br><i>Case-control study</i> —For matched studies, give matching criteria and the number of controls per case                                                                                                                                                                                                                                                     |                      |
| Variables            | 7        | Clearly define all outcomes, exposures, predictors, potential confounders, and effect modifiers. Give diagnostic criteria, if applicable                                                                                                                                                                                                                                                                                                                                       |                      |

| Section and Item             | Item No. | Recommendation                                                                                                                                                                                                                                                                                            | Reported on Page No. |
|------------------------------|----------|-----------------------------------------------------------------------------------------------------------------------------------------------------------------------------------------------------------------------------------------------------------------------------------------------------------|----------------------|
| Data Sources/<br>Measurement | 8*       | For each variable of interest, give sources of data and details of methods of assessment (measurement). Describe comparability of assessment methods if there is more than one group                                                                                                                      |                      |
| Bias                         | 9        | Describe any efforts to address potential sources of bias                                                                                                                                                                                                                                                 |                      |
| Study Size                   | 10       | Explain how the study size was arrived at                                                                                                                                                                                                                                                                 |                      |
| Quantitative Variables       | 11       | Explain how quantitative variables were handled in the analyses. If applicable, describe which groupings were chosen and why                                                                                                                                                                              |                      |
| Statistical Methods          | 12       | (a) Describe all statistical methods, including those used to control for confounding                                                                                                                                                                                                                     |                      |
|                              |          | (b) Describe any methods used to examine subgroups and interactions                                                                                                                                                                                                                                       |                      |
|                              |          | (c) Explain how missing data were addressed                                                                                                                                                                                                                                                               |                      |
|                              |          | (d) <i>Cohort study</i> —If applicable, explain how loss to follow-up was addressed<br><i>Case-control study</i> —If applicable, explain how matching of cases and controls was addressed<br><i>Cross-sectional study</i> —If applicable, describe analytical methods taking account of sampling strategy |                      |
|                              |          | (e) Describe any sensitivity analyses                                                                                                                                                                                                                                                                     |                      |
| <b>Results</b>               |          |                                                                                                                                                                                                                                                                                                           |                      |
| Participants                 | 13*      | (a) Report numbers of individuals at each stage of study—eg numbers potentially eligible, examined for eligibility, confirmed eligible, included in the study, completing follow-up, and analysed                                                                                                         |                      |
|                              |          | (b) Give reasons for non-participation at each stage                                                                                                                                                                                                                                                      |                      |
|                              |          | (c) Consider use of a flow diagram                                                                                                                                                                                                                                                                        |                      |
| Descriptive Data             | 14*      | (a) Give characteristics of study participants (eg demographic, clinical, social) and information on exposures and potential confounders                                                                                                                                                                  |                      |
|                              |          | (b) Indicate number of participants with missing data for each variable of interest                                                                                                                                                                                                                       |                      |
|                              |          | (c) <i>Cohort study</i> —Summarise follow-up time (eg, average and total amount)                                                                                                                                                                                                                          |                      |
| Outcome Data                 | 15*      | <i>Cohort study</i> —Report numbers of outcome events or summary measures over time                                                                                                                                                                                                                       |                      |
|                              |          | <i>Case-control study</i> —Report numbers in each exposure category, or summary measures of exposure                                                                                                                                                                                                      |                      |
|                              |          | <i>Cross-sectional study</i> —Report numbers of outcome events or summary measures                                                                                                                                                                                                                        |                      |

| Section and Item         | Item No. | Recommendation                                                                                                                                                                                               | Reported on Page No. |
|--------------------------|----------|--------------------------------------------------------------------------------------------------------------------------------------------------------------------------------------------------------------|----------------------|
| Main Results             | 16       | (a) Give unadjusted estimates and, if applicable, confounder-adjusted estimates and their precision (eg, 95% confidence interval). Make clear which confounders were adjusted for and why they were included |                      |
|                          |          | (b) Report category boundaries when continuous variables were categorized                                                                                                                                    |                      |
|                          |          | (c) If relevant, consider translating estimates of relative risk into absolute risk for a meaningful time period                                                                                             |                      |
| Other Analyses           | 17       | Report other analyses done—eg analyses of subgroups and interactions, and sensitivity analyses                                                                                                               |                      |
| <b>Discussion</b>        |          |                                                                                                                                                                                                              |                      |
| Key Results              | 18       | Summarise key results with reference to study objectives                                                                                                                                                     |                      |
| Limitations              | 19       | Discuss limitations of the study, taking into account sources of potential bias or imprecision. Discuss both direction and magnitude of any potential bias                                                   |                      |
| Interpretation           | 20       | Give a cautious overall interpretation of results considering objectives, limitations, multiplicity of analyses, results from similar studies, and other relevant evidence                                   |                      |
| Generalisability         | 21       | Discuss the generalisability (external validity) of the study results                                                                                                                                        |                      |
| <b>Other Information</b> |          |                                                                                                                                                                                                              |                      |
| Funding                  | 22       | Give the source of funding and the role of the funders for the present study and, if applicable, for the original study on which the present article is based                                                |                      |

\*Give information separately for cases and controls in case-control studies and, if applicable, for exposed and unexposed groups in cohort and cross-sectional studies.

**Once you have completed this checklist, please save a copy and upload it as part of your submission. DO NOT include this checklist as part of the main manuscript document. It must be uploaded as a separate file.**

# BMJ Open

## DISEASES WITH ORAL MANIFESTATIONS AMONG ADULT ASTHMATICS IN FINLAND - A POPULATION- BASED MATCHED COHORT STUDY

|                                 |                                                                                                                                                                                                                                                                                                                                                                                                                                                                                                                                                                                                                                                                                               |
|---------------------------------|-----------------------------------------------------------------------------------------------------------------------------------------------------------------------------------------------------------------------------------------------------------------------------------------------------------------------------------------------------------------------------------------------------------------------------------------------------------------------------------------------------------------------------------------------------------------------------------------------------------------------------------------------------------------------------------------------|
| Journal:                        | <i>BMJ Open</i>                                                                                                                                                                                                                                                                                                                                                                                                                                                                                                                                                                                                                                                                               |
| Manuscript ID                   | bmjopen-2021-053133.R1                                                                                                                                                                                                                                                                                                                                                                                                                                                                                                                                                                                                                                                                        |
| Article Type:                   | Original research                                                                                                                                                                                                                                                                                                                                                                                                                                                                                                                                                                                                                                                                             |
| Date Submitted by the Author:   | 02-Oct-2021                                                                                                                                                                                                                                                                                                                                                                                                                                                                                                                                                                                                                                                                                   |
| Complete List of Authors:       | Lemmetyinen, Riikka; University of Helsinki, Haartman Institute; University of Helsinki Department of Public Health<br>Karjalainen, Jussi; Tampere University Hospital, Allergy Centre; Tampere University, Faculty of Medicine and Health Technology<br>But, Anna; University of Helsinki Department of Public Health<br>Renkonen, Risto ; Helsingin yliopisto, Haartman Institute; HUS, HUSLAB<br>Pekkanen, Juha; University of Helsinki Department of Public Health; National Institute for Health and Welfare<br>Haukka, Jari; University of Helsinki Department of Public Health<br>Toppila-Salmi, Sanna; Skin and Allergy Hospital; University of Helsinki, Medicum, Haartman Institute |
| <b>Primary Subject Heading</b>: | Dentistry and oral medicine                                                                                                                                                                                                                                                                                                                                                                                                                                                                                                                                                                                                                                                                   |
| Secondary Subject Heading:      | Respiratory medicine                                                                                                                                                                                                                                                                                                                                                                                                                                                                                                                                                                                                                                                                          |
| Keywords:                       | EPIDEMIOLOGY, ORAL MEDICINE, PUBLIC HEALTH, Asthma < THORACIC MEDICINE                                                                                                                                                                                                                                                                                                                                                                                                                                                                                                                                                                                                                        |
|                                 |                                                                                                                                                                                                                                                                                                                                                                                                                                                                                                                                                                                                                                                                                               |

SCHOLARONE™  
Manuscripts

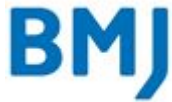

I, the Submitting Author has the right to grant and does grant on behalf of all authors of the Work (as defined in the below author licence), an exclusive licence and/or a non-exclusive licence for contributions from authors who are: i) UK Crown employees; ii) where BMJ has agreed a CC-BY licence shall apply, and/or iii) in accordance with the terms applicable for US Federal Government officers or employees acting as part of their official duties; on a worldwide, perpetual, irrevocable, royalty-free basis to BMJ Publishing Group Ltd ("BMJ") its licensees and where the relevant Journal is co-owned by BMJ to the co-owners of the Journal, to publish the Work in this journal and any other BMJ products and to exploit all rights, as set out in our [licence](#).

The Submitting Author accepts and understands that any supply made under these terms is made by BMJ to the Submitting Author unless you are acting as an employee on behalf of your employer or a postgraduate student of an affiliated institution which is paying any applicable article publishing charge ("APC") for Open Access articles. Where the Submitting Author wishes to make the Work available on an Open Access basis (and intends to pay the relevant APC), the terms of reuse of such Open Access shall be governed by a Creative Commons licence – details of these licences and which [Creative Commons](#) licence will apply to this Work are set out in our licence referred to above.

Other than as permitted in any relevant BMJ Author's Self Archiving Policies, I confirm this Work has not been accepted for publication elsewhere, is not being considered for publication elsewhere and does not duplicate material already published. I confirm all authors consent to publication of this Work and authorise the granting of this licence.

1  
2  
3 DISEASES WITH ORAL MANIFESTATIONS AMONG ADULT ASTHMATICS  
4  
5 IN FINLAND: A POPULATION-BASED MATCHED COHORT STUDY  
6

7 R. Lemmetyinen,<sup>1,2</sup> J. Karjalainen,<sup>3,4</sup> A. But,<sup>2</sup> R. Renkonen,<sup>1,5</sup> J. Pekkanen,<sup>2,6</sup> J. Haukka,<sup>2\*</sup> S.  
8  
9 Toppila-Salmi S<sup>7,8\*</sup>  
10  
11  
12  
13

14 <sup>1</sup>Haartman Institute, University of Helsinki, Helsinki, Finland

15 <sup>2</sup>Department of Public Health, University of Helsinki, Helsinki, Finland

16 <sup>3</sup>Allergy Centre, Tampere University Hospital, Tampere, Finland

17 <sup>4</sup>Faculty of Medicine and Health Technology, Tampere University, Tampere, Finland

18 <sup>5</sup>HUSLAB, Helsinki University Hospital, Helsinki, Finland

19 <sup>6</sup>National Institute for Health and Welfare, Helsinki, Finland

20 <sup>7</sup>Helsinki University Hospital, Skin and Allergy Hospital, Helsinki, Finland

21 <sup>8</sup>Medicum, Haartman Institute, University of Helsinki, Helsinki, Finland  
22  
23  
24  
25  
26  
27  
28  
29  
30  
31  
32  
33  
34  
35  
36  
37  
38  
39  
40  
41  
42  
43  
44  
45  
46  
47  
48  
49  
50  
51  
52  
53  
54  
55  
56  
57  
58  
59  
60

\*Shared last authorship.

Address correspondence and reprint requests to:

Riikka Lemmetyinen, DDS, Transplantation Laboratory, Haartman Institute, PO Box 21

(Haartmaninkatu 3), FI 00014 University of Helsinki, Finland, riikka.lemmetyinen@helsinki.fi

## ABSTRACT

**Objectives:** Many comorbidities are associated with adult asthma and may exacerbate the asthma burden of disease. This study aims to investigate the risk for major oral diseases or oral-manifesting diseases in asthmatic compared to nonasthmatic adults.

**Design:** We conducted a population-based matched cohort study with a 13.8-year follow-up.

**Setting:** A baseline questionnaire was completed by participants in 1997 and follow-up data were extracted from the national hospital discharge registry of the National Institute for Health and Welfare in Finland from 1997 through 2014.

**Participants:** A total of 1394 adults with asthma were matched with 2398 adults without asthma based on sex, age and area of residence. Asthmatic adults were identified from the Drug Reimbursement Register of the Finnish Social Insurance Institution based on a special drug reimbursement right resulting from asthma. Participants without asthma were identified from the Population Register.

**Main outcomes and measures:** Oral health-related primary diagnoses were retrieved using codes from the International Classification of Diseases, tenth edition (ICD-10) and divided into groups of diseases. Cox's proportional hazards models stratified by matching unit and models matched and adjusted for pack-years, education level and body mass index (when possible) were used to evaluate the matched and further adjusted hazard ratios (HR) for diseases comparing asthmatic and nonasthmatic cohorts.



1  
2  
3 **Results:** Adult asthma was associated with a higher risk for any oral-manifesting disease (adjusted  
4 HR 1.41, 95% confidence interval [CI] 1.11–1.80), herpes zoster (adjusted HR 6.18, 95% CI 1.21–  
5 31.6), benign tumours of the oral cavity and pharynx (matched HR 1.94, 95% CI 1.05–3.56) and  
6 dermatological diseases (pemphigus, pemphigoid, dermatitis herpetiformis, psoriasis and lichen  
7 planus, HR 1.67, 95% CI 1.01–2.78).  
8  
9  
10  
11  
12  
13  
14  
15  
16

17 **Conclusions:** In this study, adult asthmatics experienced a higher risk for a major oral disease or  
18 oral-manifesting disease.  
19  
20  
21  
22

### 23 **Strengths and limitations of this study**

- 24 • This study is a population-based, matched cohort design with a nearly 14-year follow-up.
- 25 • A detection bias was possible given the more intensive use of healthcare services amongst asthmatics  
26 (and people with any moderate to severe chronic disease) compared with nonasthmatics, potentially  
27 impacting the results.
- 28 • The possible causal relationship between asthma and oral health conditions may be confounded by  
29 asthma medications, which decrease salivary flow and lower the pH in the oral cavity.
- 30 • An asthma diagnosis was confirmed by a medical doctor and based on lung function tests and typical  
31 medical history.
- 32 • The study lacks data from primary care, where common dental or oral problems, such as periodontitis or  
33 oral candidiasis, are typically treated.  
34  
35  
36  
37  
38  
39  
40  
41  
42  
43  
44  
45  
46  
47  
48  
49

50 Abstract word count: 291

51 Total word count: 3585

52 Total number of tables/figures: 4

53 Number of references: 49

54 Keywords: epidemiology, oral medicine, public health, asthma  
55  
56  
57  
58  
59  
60

## INTRODUCTION

Asthma is one of the most common chronic diseases in children and adults, recognised for its characteristic pattern of symptoms, such as its timing, triggers and response to treatment. Typical symptoms include wheezing, shortness of breath, chest tightness and a cough, yet a careful patient history remains crucial for the differential diagnosis. The prevalence of asthma in adults ranges from 0.2% to 21.0%, remaining highest in developed countries and most likely underestimated in poorer countries [1]. In addition to socioeconomic class and a genetic predisposition, megatrends such as climate change, ageing and urbanisation impact asthma prevalence [2–4]. Whilst asthma has been considered a single disease, recent studies have shown that it consists of multiple phenotypes [5]. Furthermore, asthma varies considerably across a patient's life, presenting differently in adults versus children. Where childhood asthma is characterised by a predominance of allergic multimorbidity and a higher prevalence amongst boys, adult asthma is associated with more respiratory symptoms and asthma medications [6]. Risk factors for adult asthma consist of a genetic predisposition, female gender, overweight, allergies, upper airway diseases and exposure to tobacco smoke or other irritants [7]. The primary adult asthma phenotypes identified thus far include (1) early-onset allergic asthma, (2) early-onset allergic moderate-to-severe remodelled asthma, (3) late-onset nonallergic eosinophilic asthma and (4) late-onset nonallergic noneosinophilic asthma, whereby an overlap of commonly reported asthma phenotypes has also been observed carrying implications for objective asthma outcomes [5,8]. Furthermore, the definition of 'early onset' varies across studies. For instance, a study investigating severe asthma subgroups defined late-asthma onset as occurring after the age of 12 years [9], whilst other studies refer to early-onset adult asthma when asthma onset was reported at 12–15 years [10]. More severe forms of adult asthma appear less stable than childhood-onset disease with more relapses and less remission, and have been associated with an increased IgE, eosinophilia, poorer adherence to therapy, recurrent infections, obesity,

1  
2  
3 smoking and a lower socioeconomic status [1,6]. Various classifications and subgroups of asthma  
4  
5 phenotypes have been proposed, but a clear consensus has not yet emerged within the scientific  
6  
7 community. The heterogeneity of severe asthma phenotypes has resulted in the development of new  
8  
9 asthma treatments targeting specific immune pathways, with perhaps a limited utility amongst the  
10  
11 general asthma population, but carrying a potential benefit to a subset of asthma patients [11].  
12  
13  
14  
15  
16

17 Studies have demonstrated that many comorbidities coexist with asthma, possibly even contributing  
18  
19 to a lower life expectancy [12]. We previously detected an increased all-cause mortality amongst  
20  
21 asthmatics in the Finnish adult population, largely explained by the development of chronic  
22  
23 obstructive pulmonary disease in smoking asthmatics, malignant respiratory tract neoplasms and  
24  
25 cardiovascular diseases [13]. In the Finnish population, the most common comorbidities of adult  
26  
27 asthma consist of hypertension, diabetes, severe psychiatric disorders and ischemic heart disease  
28  
29 [14]. Other known asthma-related comorbidities include rhinitis, chronic sinusitis, gastroesophageal  
30  
31 reflux disease, obstructive sleep apnoea, hormonal disorders, obesity, hyperventilation, glottic  
32  
33 dysfunction and respiratory infections [15]. In a population-based cross-sectional study covering 1.4  
34  
35 million Scottish patients, comorbidities associated with asthma in adults included chronic  
36  
37 obstructive pulmonary disease, bronchiectasis, eczema/psoriasis, dyspepsia, depression and anxiety  
38  
39 [16].  
40  
41  
42  
43  
44  
45  
46

47 Asthma was previously associated with herpes zoster, tooth decay, dental erosion, oral candidiasis,  
48  
49 periodontal disease, psoriasis and gastroesophageal reflux disease [16–25]. A cross-sectional, self-  
50  
51 reported study investigated the association of oral health and asthma/allergic rhinitis/atopic  
52  
53 dermatitis in a large population of Korean adolescents over a 12-month period [26]. Poor oral health  
54  
55 was significantly correlated with the prevalence of asthma/allergic rhinitis/atopic dermatitis. That  
56  
57 study benefited from a large sample of over 130 000 participants, although the assessment of  
58  
59  
60

1  
2  
3 causality was limited due to its cross-sectional design [26]. The oral cavity is closely connected  
4  
5 with the lower airways given the anatomical location and in terms of functions such as conducting  
6  
7 and modifying inhaled air and speech. A recent review outlined one theory suggesting that the lung  
8  
9 microbiota results from the random immigration of bacteria originally from the oral microbiota,  
10  
11 random bacterial reproduction in the lung and the random exclusion of lung bacteria [27]. That  
12  
13 same review suggested that associations between asthma and oral health are explained by asthma  
14  
15 medications, mainly  $\beta_2$ -agonists and inhaled steroids. Specifically, asthma inhalers decrease saliva  
16  
17 production and its components, which protect and rinse the oral cavity and teeth. They also contain  
18  
19 sugary components and create a pH <5.5, thus inducing dental caries and erosion [27,28]. The  
20  
21 direct effects of asthma on periodontal health may involve dehydrating the alveolar mucosa due to  
22  
23 mouth breathing, and altering the immune response via an increased concentration of IgE, which  
24  
25 may cause periodontal destruction [25,29]. Furthermore, obesity is a major risk factor for asthma,  
26  
27 and closely connected to overeating and the high consumption of sweet foods and drinks, possibly  
28  
29 leading to poor oral health [25,30].  
30  
31  
32  
33  
34  
35  
36  
37

### 38 **Study aim**

39  
40 This cohort study aimed to investigate the hazard rate of major oral-manifesting diseases in  
41  
42 asthmatic adults compared with nonasthmatic adults. We hypothesised that asthmatics experience  
43  
44 more major oral diseases than nonasthmatics.  
45  
46  
47  
48

## 49 **METHODS**

### 50 **Study design**

51  
52 This population-based, matched cohort study with follow-up began with a questionnaire completed  
53  
54 in 1997, which collected data from asthmatics and matched nonasthmatics on their living  
55  
56 environment, allergies, smoking duration and quantity, weight and education level. The  
57  
58  
59  
60

1  
2  
3 questionnaire was sent to 4958 individuals, 3792 of whom responded. Altogether, this study  
4  
5 consisted of 1394 asthmatics and 2398 adults without asthma. Follow-up data including all  
6  
7 diagnostics codes for the participants who responded were collected from the national hospital  
8  
9 discharge registry of the National Institute for Health and Welfare from 1997 to 2014.  
10  
11  
12  
13

14 **Patient and Public Involvement** Study participants were not involved in planning the study  
15  
16 design. Extended data from the registers were collected with approval from the National Institute  
17  
18 for Health and Welfare. Study results have been published only in peer-reviewed journals, with no  
19  
20 other information related to the results provided to participants.  
21  
22  
23  
24  
25

26 **Ethics statement** Approval for the study was obtained from the ethical committee at Tampere  
27  
28 University Hospital (R15030) and written informed consent was obtained from all subjects.  
29  
30  
31  
32

### 33 **Study population**

34  
35 Participants with and without asthma were matched based on sex, age ( $\pm 2$  years) and area of  
36  
37 residence by postal code. A total of 1400 asthmatic adults were identified from the Drug  
38  
39 Reimbursement Register of the Finnish Social Insurance Institution based on a special drug  
40  
41 reimbursement right due to an asthma diagnosis. The population register was used to identify 2800  
42  
43 matched nonasthmatics. In total, 248 asthmatics and 511 nonasthmatics were recruited from the  
44  
45 Mini Finland Health Survey [31]. All asthmatics fulfilled the criteria for physician-diagnosed  
46  
47 asthma, criteria which included a typical history, clinical features and asthma course and lung  
48  
49 function tests. Participants were over 30 years old (Table 1), nearly 62% were male and 38%  
50  
51 women. An estimate of participants' lifetime tobacco exposure at baseline was calculated in pack-  
52  
53 years [32]. The body mass index was grouped according to four categories, while level of education  
54  
55  
56  
57  
58  
59  
60

1  
2  
3  
4  
5  
6  
7  
8  
9  
10  
11  
12  
13  
14  
15  
16  
17  
18  
19  
20  
21  
22  
23  
24  
25  
26  
27  
28  
29  
30  
31  
32  
33  
34  
35  
36  
37  
38  
39  
40  
41  
42  
43  
44  
45  
46  
47  
48  
49  
50  
51  
52  
53  
54  
55  
56  
57  
58  
59  
60

was divided into three categories based on the Finnish education system. The study population was described in further detail elsewhere [13].

For peer review only

**Table 1** Baseline characteristics collected from Finnish patients via questionnaire in 1997

|                                   | No asthma, n (%) | Asthma, n (%) | Missing (%) |
|-----------------------------------|------------------|---------------|-------------|
| <b>Sex</b>                        |                  |               |             |
| <b>Men</b>                        | 912 (38.0)       | 532 (38.2)    |             |
| <b>Women</b>                      | 1486 (62.0)      | 862 (61.8)    |             |
| <b>Total</b>                      | 2398             | 1394          |             |
| <b>Age at baseline (in years)</b> |                  |               |             |
| <b>≤59</b>                        | 1506 (62.8)      | 893 (64.1)    |             |
| <b>60–69</b>                      | 699 (29.1)       | 401 (28.8)    |             |
| <b>70–79</b>                      | 166 (6.9)        | 84 (6.0)      |             |
| <b>≥80</b>                        | 27 (1.1)         | 16 (1.1)      |             |
| <b>Pack-years</b>                 |                  |               | 6.7         |
| <b>0</b>                          | 1286 (57.1)      | 625 (48.6)    |             |
| <b>≤19</b>                        | 595 (26.4)       | 389 (30.2)    |             |
| <b>≥20</b>                        | 371 (16.5)       | 273 (21.2)    |             |
| <b>BMI (kg x m<sup>-2</sup>)</b>  |                  |               | 2.4         |
| <b>Underweight (&lt;18.5)</b>     | 26 (1.1)         | 19 (1.4)      |             |
| <b>Normal (18.5–24.99)</b>        | 998 (42.6)       | 463 (34.0)    |             |
| <b>Overweight (25–29.99)</b>      | 958 (40.9)       | 577 (42.4)    |             |
| <b>Obese (≥30)</b>                | 358 (15.3)       | 303 (22.2)    |             |
| <b>Education level</b>            |                  |               | 2.2         |
| <b>Matriculation exam</b>         | 435 (18.5)       | 187 (13.8)    |             |
| <b>Secondary school</b>           | 560 (23.8)       | 322 (23.7)    |             |
| <b>Primary school or less</b>     | 1356 (57.7)      | 850 (62.5)    |             |

Lifetime tobacco exposure was calculated in pack-years (number of cigarettes per day/20 x number of years smoked, where 1 pipe = 2.5 cigarettes and 1 cigar = 4 cigarettes) upon which individuals were divided into three groups: 0, ≤19 and ≥20 pack-years.

Body mass index (BMI) assessed as weight in kilograms divided by the square of the height in metres, then divided into four categories according to World Health Organisation classification.

Level of education was obtained through a questionnaire and categorised based on the Finnish education system: matriculation examination (13 years, reference value), secondary school or equivalent (9 years) and primary school or less (≤6 years).

## Outcomes

In this study, we focused on oral diseases and diagnoses that can manifest in the oral cavity. The diagnoses were identified from hospital visit and hospitalisation data obtained from the national hospital discharge registry of the National Institute for Health and Welfare from 1997 to 2014. Only the primary diagnoses were retrieved using codes from the International Classification of Diseases, tenth edition (ICD-10), and were divided into five disease groups: infections, malign neoplasms,

1  
2  
3 benign neoplasms, dental diseases and dermatological diseases. The first group consisted of viral  
4 and fungal infections (herpes simplex (B00.1); herpes zoster (B02); hand, foot and mouth disease  
5 (B08.4); herpangina (B08.5); HIV disease resulting in candidiasis (B20.4); Kaposi sarcoma  
6 (B21.0); Burkitt lymphoma (B21.1); mumps (B26.9); Epstein-Barr (B27.0); candidiasis (B37); and  
7 tonsillar aspergillosis (B44.2). Malign neoplasms consisted of malignant neoplasms of the lip, oral  
8 cavity and pharynx (C00-C14); malignant melanoma of the lip (C43.0); and basal cell carcinoma of  
9 the lip (C44.0). Benign neoplasms included benign tumours (D00.0, D03.0 and D03.3), in situ  
10 neoplasms (D23.0) and other benign neoplasms of the lip, oral cavity, pharynx or bone of the skull  
11 and face (D10, D11, D16.4, D16.5 and D37.0). Dental diseases included diseases of the oral cavity,  
12 salivary glands and jaws (K00–K14). The last group included dermatological diseases (pemphigus  
13 L10), pemphigoid (L12), dermatitis herpetiformis (L13.0), psoriasis (L40) and lichen planus (L43).  
14 We used a one-year wash-out period from the beginning of follow-up in 1997 to identify and  
15 exclude those with a pre-existing disease of interest. For each outcome of interest, those eligible for  
16 follow-up (e.g., individuals without diagnoses during the wash-out period) were followed up until  
17 the first occurrence defined as the first hospital visit/hospitalisation with a diagnosis of interest,  
18 death or the end of follow-up (31 December 2014). Therefore, each diagnosis was recorded only  
19 once.  
20  
21  
22  
23  
24  
25  
26  
27  
28  
29  
30  
31  
32  
33  
34  
35  
36  
37  
38  
39  
40  
41  
42  
43  
44

### 45 **Statistical analyses**

46 We assessed and reported the incidence of the diseases of interest. Cox proportional hazards models  
47 stratified by the matching criteria (sex, age and area of residence by postal code) and models  
48 matched and adjusted for smoking, education level and body mass index (when possible) were used  
49 to evaluate the matched and additionally adjusted hazard ratios (HRs) for diseases comparing  
50 asthmatic and nonasthmatic individuals. We modelled each comorbidity separately. The differences  
51 in comorbidity-free survival between asthmatics and nonasthmatics were also assessed by plotting  
52  
53  
54  
55  
56  
57  
58  
59  
60



1  
2  
3 the Kaplan–Meier survival curves and performing log-rank tests. In all analyses, we considered  
4  
5  $P < 0.05$  statistically significant. All data analyses were performed using the R statistical software  
6  
7 package, version 3.6.1 [33].  
8  
9

## 10 11 12 **RESULTS**

13  
14 The mean follow-up period was 13.8 years. A total of 58 113 person-years accumulated for 3792  
15  
16 individuals. Overall, 71% of asthmatic patients used inhaled corticosteroids and 76% used any  
17  
18 inhaled asthma medication at baseline (in 1997). The risk of experiencing any oral health–related  
19  
20 disease (including all diseases investigated) was higher amongst asthmatics (matched HR 1.61, 95%  
21  
22 confidence interval [CI] 1.24–2.10,  $P < 0.001$ , Table 2), with the Kaplan-Meier plot (Figure 1)  
23  
24 showing a clear difference between asthmatics and nonasthmatics individuals. These results  
25  
26 remained significant after adjusting for pack-years, education level and body mass index (HR 1.41,  
27  
28 95% CI 1.11–1.80,  $P = 0.001$ ).  
29  
30  
31  
32  
33

34  
35 Only a few cases of candidiasis and herpes simplex infections were recorded in the Infections-  
36  
37 group. Since these cases primarily consisted of herpes zoster, we calculated the HR for herpes  
38  
39 zoster cases only. We found that the rate of herpes zoster was nearly seven times higher in the  
40  
41 asthmatic group (matched HR 6.94, 95% CI 1.50–32.1,  $P < 0.05$ ) compared with nonasthmatics.  
42  
43 After adjusting for pack-years, this association persisted (adjusted HR 6.18, 95% CI 1.21–31.6,  
44  
45  $P < 0.05$ ). Benign tumours were 1.5-fold more frequent amongst asthmatics (matched HR 1.94, 95%  
46  
47 CI 1.05–3.56,  $P < 0.05$ ). The most common benign tumours in the head area included neoplasms of  
48  
49 the inner mouth and tumours of the parotid gland and other major salivary glands.  
50  
51  
52  
53

54  
55  
56 Asthma was not significantly associated with an increased risk for malignant neoplasms of the lip,  
57  
58 oral cavity or pharynx (matched HR 2.33, 95% CI 0.91–5.99,  $P = 0.080$ ). Cancers of the lip, oral  
59  
60

1  
2  
3 cavity or pharynx as well as melanoma or basal cell carcinoma of the lip were recorded. The risk for  
4  
5 of non-neoplastic conditions of the head and neck region, in addition to diseases of the oral cavity,  
6  
7 salivary glands and jaws was not significantly higher amongst asthmatics (HR 1.21, 95% CI 0.84–  
8  
9 1.73, P=0.059). Similarly, dental diseases such as caries, chronic apical periodontitis and periapical  
10  
11 abscess taken together were not significantly associated with adult asthma neither in a univariate  
12  
13 analysis (matched HR 1.21, 95% CI 0.84–1.73, P=0.307) nor after adjustment (HR 1.40, 95% CI  
14  
15 0.93–2.12). A higher risk for dental caries on its own emerged amongst adult asthmatics (matched  
16  
17 HR 2.13, 95% CI 0.90–5.05, P=0.085) but the association was not statistically significant.  
18  
19  
20  
21  
22

23  
24 Finally, we examined dermatological diseases that may have oral manifestations, finding that the  
25  
26 investigated diseases associated with asthma in the matched cohort (matched HR 1.67, 95% CI  
27  
28 1.01–2.78, P=0.048). However, after adjusting for pack-years, education level and body mass index,  
29  
30 the association diminished (adjusted HR 1.72, 95% CI 0.85–3.47, P=0.129). Psoriasis and lichen  
31  
32 planus were the most common skin diseases representing 89% of all skin diseases examined  
33  
34 amongst asthmatic adults (Table 3). Furthermore, amongst adults without asthma, psoriasis and  
35  
36 lichen planus comprised 77% of all skin diseases investigated in this study. Other dermatological  
37  
38 diseases indentified included pemphigus, pemphigoid and dermatitis herpetiformis.  
39  
40  
41  
42  
43  
44  
45  
46  
47  
48  
49  
50  
51  
52  
53  
54  
55  
56  
57  
58  
59  
60

**Table 2** Comparison of Finnish nonasthmatic and asthmatic adults for oral comorbidities, 1997–2014

|                                |           | 10 000 person-years | Events | Rate (95% CI) per 10 000 person-years | Matched HR (95% CI) | Adjusted HR (95% CI) |
|--------------------------------|-----------|---------------------|--------|---------------------------------------|---------------------|----------------------|
| <b>Any oral disease</b>        | No asthma | 33.46               | 165    | 4.93 (4.21–5.74)                      | 1                   | 1                    |
|                                | Asthma    | 18.41               | 136    | 7.39 (6.20–8.74)                      | 1.61 (1.24–2.10)    | 1.41 (1.11–1.80)*    |
| <b>Herpes zoster</b>           | No asthma | 34.72               | 4      | 0.11 (0.03–0.29)                      | 1                   | 1                    |
|                                | Asthma    | 19.51               | 14     | 0.72 (0.39–1.20)                      | 6.94 (1.50–32.1)    | 6.18 (1.21–31.6)†    |
| <b>Malign neoplasms</b>        | No asthma | 34.66               | 11     | 0.32 (0.16–0.57)                      | 1                   | 1                    |
|                                | Asthma    | 19.52               | 13     | 0.67 (0.35–1.14)                      | 2.33 (0.91–5.99)    | 2.13 (0.72–6.34)†    |
| <b>Benign neoplasms</b>        | No asthma | 34.53               | 28     | 0.81 (0.54–1.17)                      | 1                   | 1                    |
|                                | Asthma    | 19.41               | 25     | 1.29 (0.83–1.90)                      | 1.94 (1.05–3.56)    | 1.64 (0.81–3.33)††   |
| <b>Dental diseases</b>         | No asthma | 34.02               | 96     | 2.82 (2.29–3.45)                      | 1                   | 1                    |
|                                | Asthma    | 19.03               | 66     | 3.47 (2.68–4.41)                      | 1.21 (0.84–1.73)    | 1.40 (0.93–2.12)††   |
| <b>Dermatological diseases</b> | No asthma | 34.35               | 42     | 1.22 (0.88–1.65)                      | 1                   | 1                    |
|                                | Asthma    | 19.19               | 36     | 1.88 (1.31–2.60)                      | 1.67 (1.01–2.78)    | 1.72 (0.85–3.47)*    |

Hazard ratios based on Cox proportional hazards regression models. In the first model, matching is considered as strata. The second model is matched and adjusted based on background variables.

Matched HR, participants with asthma and without asthma are only matched for sex, age and area of residence by postal code.

**Adjusted HRs:**

\*Matched for sex, age and area of residence by postal code and adjusted for pack-years, education level and body mass index.

†Matched for sex, age and area of residence by postal code and adjusted for pack-years.

††Matched for sex, age and area of residence by postal code and adjusted for pack-years and education level.

Bold values denote statistical significance at the P<0.05 level.

**Table 3** Frequency of oral diagnoses during follow-up, 1997–2014

|                                                            | No asthma | Asthma |
|------------------------------------------------------------|-----------|--------|
| <b>Virus infections</b>                                    |           |        |
| Herpes zoster (B02)                                        | 4         | 14     |
| Other infections (B00, B37)                                | 3         | 1      |
| <b>Oral cancer</b>                                         |           |        |
| Lip, oral cavity and pharynx (C00-C02, C04, C10, C13, C14) | 7         | 11     |
| Melanoma or basal cell carcinoma of lip (C44)              | 4         | 3      |
| <b>Benign tumours</b>                                      |           |        |
| Mouth and pharynx (D10)                                    | 14        | 16     |
| Major salivary glands (D11)                                | 8         | 8      |
| Other benign tumours (D03, D23, D37)                       | 7         | 2      |
| <b>Dental diseases</b>                                     |           |        |
| Dental caries (K01, K02)                                   | 16        | 21     |
| Diseases of the salivary glands (K11)                      | 16        | 15     |
| Stomatitis and related lesions (K12)                       | 6         | 5      |
| Diseases of the lip and oral mucosa (K13)                  | 17        | 8      |
| Diseases of the tongue (K14)                               | 8         | 5      |
| Other dental diseases (K03, K04, K10)                      | 33        | 14     |
| <b>Dermatological diseases</b>                             |           |        |
| Psoriasis (L40)                                            | 21        | 22     |
| Lichen planus (L43)                                        | 13        | 12     |
| Pemphigus (L10)                                            | 1         | 0      |
| Pemphigoid (L12)                                           | 4         | 3      |
| Dermatitis herpetiformis (L13.0)                           | 5         | 1      |

## DISCUSSION

In this population-based, cohort study, asthmatics carried a higher risk of experiencing an oral-manifesting disease. The differences in the risks for infections, benign neoplasms and dermatological diseases contributed to the overall increase. The risk for benign oral tumours (including benign salivary gland tumours) was 1.5-fold higher, whilst the risk for a viral infection, specifically, herpes zoster, was nearly seven times higher amongst asthmatic adults compared with nonasthmatic adults. Dermatological diseases, mainly psoriasis and lichen planus, associated with asthma in the matched cohort, although the risk was not significant in the adjusted model.

1  
2  
3  
4  
5 We observed an increased risk for herpes zoster amongst asthmatic adults. An 8-year follow-up  
6 study conducted in Taiwan among over 40 000 newly diagnosed, adult asthmatics compared with  
7 age- and sex-matched nonasthmatics found that the risk of herpes zoster was 1.48-fold higher in  
8 asthmatics [34]. A meta-analysis of 12 studies investigating the relationship between asthma and  
9 herpes zoster found that asthma was associated with a greater risk (risk ratio [RR] 1.24, 95% CI  
10 1.16–1.31,  $P < 0.0001$ ) of infection [35]. Herpes zoster infection in the intraoral region classically  
11 presents as a unilateral dermatomal rash with a maculopapular appearance, preceded with hard,  
12 neuropathic pain [36,37]. Caused by the reactivation of varicella zoster virus, herpes zoster may  
13 occur spontaneously or due to an immune system deficiency. Respiratory viruses associated with  
14 asthma exacerbations include respiratory syncytial virus (RSV), influenza viruses and human  
15 rhinoviruses, as well as coronaviruses, parainfluenza viruses, adenoviruses and, more recently,  
16 metapneumoviruses and bocaviruses [38,39]. Presumably, an age-related decline in immune  
17 function and a coexisting viral infection promotes persistent chronic inflammation of the airways  
18 [40].  
19  
20  
21  
22  
23  
24  
25  
26  
27  
28  
29  
30  
31  
32  
33  
34  
35  
36  
37  
38  
39

40 We previously found that a higher all-cause mortality amongst adult asthmatics was largely  
41 explained by the development of chronic obstructive pulmonary disease, malignant respiratory tract  
42 neoplasms and cardiovascular diseases [13]. Although highly lethal in general, we detected no  
43 increased mortality resulting from oral cancer amongst asthmatics in our previous study,  
44 presumably due to its low incidence compared to other causes of death amongst both asthmatics and  
45 controls. In agreement with our previous findings, asthma did not significantly associate with  
46 malignant neoplasms of the oral cavity or pharynx in the study reported here.  
47  
48  
49  
50  
51  
52  
53  
54  
55  
56  
57  
58  
59  
60

1  
2  
3 Our results suggest that the risk of benign oral tumours could be higher amongst asthmatic adults  
4 compared with nonasthmatic adults. To our knowledge, this represents the first study to examine  
5 the association between benign oral tumours and asthma. Over 30% of the benign tumours amongst  
6 asthmatics consisted of salivary gland tumours. Whilst the cause of salivary gland tumours remains  
7 unknown, autoimmune conditions such as diabetes and Sjögren's syndrome are associated with  
8 salivary gland swelling [41]. We suspect that the increased risk associated with benign oral tumours  
9 is explained by a combination of autoimmune dysfunction, decreased salivary flow (due to the use  
10 of  $\beta_2$ -agonists) and a detection bias resulting from the overdiagnosis of benign tumours amongst  
11 asthmatics, individuals who consult healthcare services more frequently.  
12  
13  
14  
15  
16  
17  
18  
19  
20  
21  
22  
23  
24  
25

26 Furthermore, we found that dental diseases (diseases including tooth decay, chronic apical  
27 periodontitis, sialadenitis and diseases of periodontal tissue) were not significantly associated with  
28 adult asthma. It is widely acknowledged that asthma medication, especially the immunosuppressive  
29 effects of inhaled corticosteroids, promote oral candidiasis and tooth decay [25]. According to a  
30 meta-analysis and systematic review of 18 studies, asthma roughly doubles the risk of dental caries  
31 in both primary and permanent dentition [17]. Plausible mechanisms contributing to tooth decay  
32 include decreased saliva secretion and a lower salivary pH due to inhaled  $\beta_2$ -agonists and  
33 corticosteroids as well as dry powder inhalers containing lactose monohydrate, and an increase in  
34 *Lactobacilli* and *Streptococcus mutans* in the oral cavity [17,21]. An increased risk for caries might  
35 also stem from the decreased biodiversity in the oral cavity and an aberrant immunity amongst  
36 asthmatics.  
37  
38  
39  
40  
41  
42  
43  
44  
45  
46  
47  
48  
49  
50  
51  
52  
53

54 The data used in this study were collected from the national hospital discharge registry of the  
55 National Institute for Health and Welfare in Finland, which collects data from hospital and health  
56 centres. The dental or and/or oral diagnoses in this study result from dental specialists working in  
57  
58  
59  
60

1  
2  
3 specialised healthcare settings. The National Institute for Health and Welfare of Finland began  
4 collecting outpatient data from public health services (such as data from dental examination) in  
5  
6 2011, and the initial years of data collection featured poor quality data. Therefore, our data do not  
7  
8 include oral status information routinely collected by dentists in primary care settings, and we  
9  
10 cannot draw any conclusions about the incidence of, for example, tooth decay from these data.  
11  
12 Additionally, oral candidiasis is presumably common amongst patients using inhaled  
13  
14 corticosteroids. However, due to its mild symptoms, the condition often remains undiagnosed. In  
15  
16 our study, only a few cases of oral candidiasis were recorded. Thus a causal relationship between  
17  
18 inhaled asthma medications and oral candidiasis could not be examined from these data.  
19  
20  
21  
22  
23  
24  
25

26 In our study, dermatological diseases with potential oral manifestations were more common  
27  
28 amongst asthmatics. Psoriasis is an immune-mediated, genetic skin and joint disease typically  
29  
30 characterised by erythematous plaques with silvery scales [23]. A recent meta-analysis indicated  
31  
32 that patients with psoriasis carry an increased risk for asthma, particularly older patients [22].  
33  
34 Furthermore, oral manifestations of psoriasis include lesions of small, whitish papules, red and  
35  
36 white plaques that follow skin lesions and bright red patches, all of which may also be associated  
37  
38 with angular cheilitis, geographic tongue lesions and a fissured tongue [42]. Whether psoriasis can  
39  
40 manifest solely in the oral mucosa has been a matter of debate for years. The benefits of our  
41  
42 relatively large, matched-cohort design used in this study allowed us to also detect associations  
43  
44 between rare diseases such as autoimmune diseases.  
45  
46  
47  
48  
49  
50

51 Based on genome-wide association studies, both asthma and autoimmune diseases are associated  
52  
53 with several single-nucleotide polymorphisms (SNPs) in the human 17q12-21 locus [43]. Although  
54  
55 rare and difficult to diagnose, some case reports suggest that an intraoral form of psoriasis exists  
56  
57 [44]. Moreover, studies have shown shared genetic variants of asthma and autoimmune diseases [4],  
58  
59  
60

1  
2  
3 possibly reflecting an increased co-existence of asthma and psoriasis compared with controls.

4  
5 Asthma and psoriasis also share certain comorbidities such as cardiovascular diseases, depression,  
6  
7 diabetes and obesity [45].  
8  
9

10  
11  
12 In line with our findings for psoriasis, another autoimmune disease, lichen planus, emerged as one  
13  
14 of the most common dermatological diseases amongst asthmatics in our study. The clinical features  
15  
16 of oral lichen planus typically include pain and burning in the mouth induced by spicy or acidic  
17  
18 foods due to lesions in the mucosa. Clinical presentations of oral lichen planus consist of reticular,  
19  
20 erosive, plaque-like and bullous lesions, which can occur individually or in combination. Frequently  
21  
22 asymptomatic, reticular oral lichen planus is, however, the most common type of lichen planus [46].  
23  
24 To our knowledge, no previous studies examined the association between lichen planus and asthma.  
25  
26  
27  
28  
29

30  
31 This study has several strengths and limitations. The strengths of this study include the population-  
32  
33 based, matched-cohort design and the inclusion of asthma diagnoses confirmed through lung  
34  
35 function tests. This study also benefits from its long follow-up period. Conversely, one limitation to  
36  
37 this study stems from the lack of primary care data, from which typical dental problems such as  
38  
39 dental caries are normally treated. We also note that the possible causal relationship between  
40  
41 asthma and oral health conditions may be confounded by asthma medications. Medications  
42  
43 commonly used to treat asthma, such as  $\beta_2$ -agonists and inhaled steroids, may promote caries,  
44  
45 dental erosion, periodontal disease, erosion and oral candidiasis [25].  
46  
47  
48  
49

50  
51 We calculated HRs to measure the difference between asthmatic and nonasthmatic patients.  
52  
53 However, using HRs, roughly interpreted as the incidence rate ratio, is not completely  
54  
55 unproblematic. The use of HRs to indicate a causal relationship is risky for two reasons: first, HR  
56  
57 may change over time and, second, HR has a built-in selection bias. [47]. We acknowledge the  
58  
59  
60



1  
2  
3 possibility of a detection bias due to the more intensive use of healthcare services by asthmatics  
4  
5 (and people with any moderate to severe chronic disease) than nonasthmatics, potentially affecting  
6  
7 our results. For some comorbidities, uncertainty (wide confidence intervals) regarding the  
8  
9 magnitudes of the observed relative differences and a limited statistical power precluding any  
10  
11 potentially existing associations should be considered when interpreting our results.  
12  
13  
14  
15  
16

17 Finally, one of the most common oral health problems, periodontitis, carries a two-way relationship  
18  
19 with diabetes mellitus, and is presumably associated with severe asthma in adults [48,49].  
20

21 Periodontitis is diagnosed and primarily treated in primary care settings. The incidence of this  
22  
23 chronic inflammatory disease of the tissue surrounding the teeth thus cannot be investigated with  
24  
25 this dataset. The clinical features of cases were not available given the register-based study design.  
26  
27

28 In cases of herpes zoster and psoriasis, ICD-10 codes do not distinguish between anatomical sites of  
29  
30 disease manifestation. However, to our knowledge, the incidence of oral manifestations of these  
31  
32 diseases remains unclear, and is therefore important to take into account for each case.  
33  
34  
35  
36

## 37 **CONCLUSIONS**

38  
39 Adult asthmatics experience a higher risk for an oral-manifesting disease. Viral and fungal  
40  
41 infections represented the most common oral disease amongst asthmatics, whilst the risk for a  
42  
43 benign tumour or dermatological disease was also higher amongst adult asthmatics. Identifying the  
44  
45 most common asthma-related oral diseases may result in an early diagnosis and better management  
46  
47 of comorbid conditions as well as the overall health of asthmatics. As such, dental professionals are  
48  
49 an important part of healthcare teams given their expertise in detecting abnormalities in the oral  
50  
51 cavity of asthmatic patients.  
52  
53  
54  
55  
56  
57  
58  
59  
60

1  
2  
3 **Contributorship statement:** R. Lemmetyinen, S. Toppila-Salmi, J. Karjalainen and J. Haukka  
4  
5 contributed to the data acquisition, analysis, interpretation and design, and revised the manuscript  
6  
7 for critical intellectual content. A. But, R. Renkonen and J. Pekkanen critically revised the  
8  
9 manuscript. All authors are accountable for all aspects of this work.  
10  
11  
12  
13

14 **Competing interests:** None declared.  
15  
16  
17  
18

19 **Funding:** This study was supported by grants from the Finnish Allergy Research Foundation, the  
20  
21 Finnish Association of Otorhinolaryngology and Head and Neck Surgery, the Finnish Medical  
22  
23 Foundation, the Finnish Society of Allergology and Immunology, the Foundation of the Finnish  
24  
25 Anti-Tuberculosis Association, the Jane and Aatos Erkko Foundation, the Paulo Foundation, the  
26  
27 Research Foundation of Pulmonary Diseases, the Tampere Tuberculosis Foundation, the Väinö and  
28  
29 Laina Kivi Foundation, the Yrjö Jahnsson Foundation and Rehabilitation Funds of the Finnish  
30  
31 Social Insurance Institution.  
32  
33  
34  
35  
36  
37

38 **Acknowledgements:** We thank the following people for their valuable contributions: Professor  
39  
40 Arpo Aromaa, Heini Huhtala MSc, Professor Timo Klaukka and Professor Markku M. Nieminen.  
41  
42  
43  
44

45 **Data sharing statement:** The data that support the findings of this study are  
46  
47 available from Statistics Finland and the National Institute for Health and Welfare. However,  
48  
49 restrictions apply to the availability of these data, which were used under licence for the current  
50  
51 study, and thus are not publicly available. Data are, however, available from the authors upon  
52  
53 reasonable request and with the permission of Statistics Finland and the National Institute for  
54  
55 Health and Welfare.  
56  
57  
58  
59  
60

**Figure 1 legend:**

**Figure 1** Kaplan–Meier survival curve of the difference in oral health–related diseases amongst asthmatics and nonasthmatics. P-value for the log-rank test.

## REFERENCES

- 1 Papi A, Brightling C, Pedersen SE, *et al.* Asthma. *Lancet*. 2018;**391**:783–800. doi:10.1016/S0140-6736(17)33311-1
- 2 Lundbäck B, Backman H, Lötvall J, *et al.* Is asthma prevalence still increasing? *Expert Rev Respir Med* 2016;**10**:39–51. doi:10.1586/17476348.2016.1114417
- 3 D’amato M, Cecchi L, Annesi-Maesano I, *et al.* News on climate change, air pollution, and allergic triggers of asthma. *J Investig Allergol Clin Immunol* 2018;**28**:91–7. doi:10.18176/jiaci.0228
- 4 Das S, Miller M, Broide DH. Chromosome 17q21 Genes ORMDL3 and GSDMB in Asthma and Immune Diseases. *Adv Immunol* 2017;**135**:1–52. doi:10.1016/BS.AI.2017.06.001
- 5 Kaur R, Chupp G. Phenotypes and endotypes of adult asthma: Moving toward precision medicine. *J Allergy Clin Immunol* 2019;**144**:1–12. doi:10.1016/j.jaci.2019.05.031
- 6 Turner S, Elnazir B, Preutthipan A, *et al.* Asthma in Children and Adults-What Are the Differences and What Can They Tell us About Asthma? *Front Pediatr* | [www.frontiersin.org](http://www.frontiersin.org) 2019;**1**:256. doi:10.3389/fped.2019.00256
- 7 de Nijs SB, Venekamp LN, Bel EH. Adult-onset asthma: Is it really different? *Eur. Respir. Rev.* 2013;**22**:44–52. doi:10.1183/09059180.00007112
- 8 Amaral R, Fonseca JA, Jacinto T, *et al.* Having concomitant asthma phenotypes is common and independently relates to poor lung function in NHANES 2007-2012. *Clin Transl Allergy* 2018;**8**:13. doi:10.1186/s13601-018-0201-3

- 1  
2  
3 9 Moore WC, Meyers DA, Wenzel SE, *et al.* Identification of Asthma Phenotypes Using  
4 Cluster Analysis in the Severe Asthma Research Program. *Am J Respir Crit Care Med*  
5 2010;**181**:315–23. doi:10.1164/rccm.200906-0896OC  
6  
7  
8  
9  
10 10 Haldar P, Pavord ID, Shaw DE, *et al.* Cluster Analysis and Clinical Asthma Phenotypes. *Am*  
11 *J Respir Crit Care Med* 2008;**178**:218–24. doi:10.1164/rccm.200711-1754OC  
12  
13  
14 11 Schoettler N, Streck ME. Recent Advances in Severe Asthma: From Phenotypes to  
15 Personalized Medicine. *Chest*. 2020;**157**:516–28. doi:10.1016/j.chest.2019.10.009  
16  
17  
18 12 Veenendaal M, Westerik JAM, van den Bemt L, *et al.* Age- and sex-specific prevalence of  
19 chronic comorbidity in adult patients with asthma: A real-life study. *npj Prim Care Respir*  
20 *Med* 2019;**29**:14. doi:10.1038/s41533-019-0127-9  
21  
22  
23  
24 13 Lemmetyinen R, Karjalainen J, But A, *et al.* Higher mortality of adults with asthma: A 15-  
25 year follow-up of a population-based cohort. *Allergy Eur J Allergy Clin Immunol*  
26 2018;**73**:1479–88. doi:10.1111/all.13431  
27  
28  
29  
30  
31  
32 14 Kauppi P, Linna M, Jantunen J, *et al.* Chronic comorbidities contribute to the burden and  
33 costs of persistent asthma. *Mediators Inflamm* 2015;**2015**. doi:10.1155/2015/819194  
34  
35  
36 15 Boulet LP, Boulay MÈ. Asthma-related comorbidities. *Expert Rev. Respir. Med.*  
37 2011;**5**:377–93. doi:10.1586/ers.11.34  
38  
39  
40  
41  
42 16 Weatherburn CJ, Guthrie B, Mercer SW, *et al.* Comorbidities in adults with asthma:  
43 Population-based cross-sectional analysis of 1.4 million adults in Scotland. *Clin Exp Allergy*  
44 2017;**47**:1246–52. doi:10.1111/cea.12971  
45  
46  
47  
48 17 Alavaikko S, Jaakkola MS, Tjäderhane L, *et al.* Asthma and caries: A systematic review and  
49 meta-analysis. *Am J Epidemiol* 2011;**174**:631–41. doi:10.1093/aje/kwr129  
50  
51  
52  
53 18 Jin Kwon H, Won Bang D, Na Kim E, *et al.* Asthma as a risk factor for zoster in adults:  
54 A population-based case-control study. *J Allergy Clin Immunol* 2016;**137**:1406–12.  
55  
56  
57  
58  
59  
60

- 1  
2  
3 19 Lønnberg AS, Skov L, Skytthe A, *et al.* Asthma in patients with psoriasis. *Br J Dermatol*  
4 2015;**172**:1660–1. doi:10.1111/bjd.13637  
5  
6  
7 20 Nair P, Gharote H, Singh P, *et al.* Herpes zoster on the face in the elderly. *BMJ Case Rep*  
8 2014;**2014**. doi:10.1136/bcr-2013-200101  
9  
10  
11  
12 21 Thomas MS, Parolia A, Kundabala M, *et al.* Asthma and oral health: a review. *Aust Dent J*  
13 2010;**55**:128–33. doi:10.1111/j.1834-7819.2010.01226.x  
14  
15  
16  
17 22 Wang J, Ke R, Shi W, *et al.* Association between psoriasis and asthma risk: A meta-analysis.  
18 *Allergy asthma Proc* 2018;**39**:103–9. doi:10.2500/aap.2018.39.4109  
19  
20  
21 23 Boehncke W-H, Schön MP. Psoriasis. *Lancet* 2015;:983–94. doi:10.1007/978-3-319-59963-  
22 2\_4  
23  
24  
25  
26 24 Ghapanchi J, Rezazadeh F, Kamali F, *et al.* Oral manifestations of asthmatic patients. *J*  
27 *Pakistan Med Assoc* 2015;**65**:1226–7. <https://jpma.org.pk/PdfDownload/7531> (accessed 25  
28 Aug 2021).  
29  
30  
31  
32  
33 25 Gani F, Caminati M, Bellavia F, *et al.* Oral health in asthmatic patients: a review Asthma and  
34 its therapy may impact on oral health. *Clin Mol Allergy* 2020;**18**:22. doi:10.1186/s12948-  
35 020-00137-2  
36  
37  
38  
39  
40 26 Wee JH, Park MW, Min C, *et al.* Poor oral health is associated with asthma, allergic rhinitis,  
41 and atopic dermatitis in Korean adolescents: A cross-sectional study. *Medicine (Baltimore)*  
42 2020;**99**:e21534. doi:10.1097/MD.00000000000021534  
43  
44  
45  
46  
47 27 Gaeckle NT, Pragman AA, Pendleton KM, *et al.* The Oral-Lung Axis: The Impact of Oral  
48 Health on Lung Health. Published Online First: 2020. doi:10.4187/respcare.07332  
49  
50  
51  
52 28 Ryberg M, Möller C, Ericson T. Saliva composition and caries development in asthmatic  
53 patients treated with beta 2-adrenoceptor agonists: a 4-year follow-up study. *Scand J Dent*  
54 *Res* 1991;**99**:212–8. doi:10.1111/J.1600-0722.1991.TB01887.X  
55  
56  
57  
58 29 Hyypä T. Gingival IgE and histamine concentrations in patients with asthma and in patients  
59  
60

1  
2  
3  
4  
5  
6  
7  
8  
9  
10  
11  
12  
13  
14  
15  
16  
17  
18  
19  
20  
21  
22  
23  
24  
25  
26  
27  
28  
29  
30  
31  
32  
33  
34  
35  
36  
37  
38  
39  
40  
41  
42  
43  
44  
45  
46  
47  
48  
49  
50  
51  
52  
53  
54  
55  
56  
57  
58  
59  
60

with periodontitis. *J Clin Periodontol* 1984;**11**:132–7. doi:10.1111/J.1600-051X.1984.TB00841.X

30 Peters U, Dixon A, Forno E. Obesity and Asthma. *J Allergy Clin Immunol* 2018;**141**:1169. doi:10.1016/J.JACI.2018.02.004

31 Pasternack R, Huhtala H, Karjalainen J. Chlamydophila (Chlamydia) pneumoniae serology and asthma in adults: A longitudinal analysis. *J Allergy Clin Immunol* 2005;**116**:1123–8. doi:10.1016/j.jaci.2005.08.030

32 Definition of pack year - NCI Dictionary of Cancer Terms - National Cancer Institute. 2011. <https://www.cancer.gov/publications/dictionaries/cancer-terms/def/pack-year> (accessed 12 Apr 2021).

33 R Core Team. R Core Team (2019). R: A language and environment for statistical computing. 2019. <https://www.r-project.org/>.

34 Peng Y-H, Fang H-Y, Wu B-R, *et al*. Adult asthma is associated with an increased risk of herpes zoster: A population-based cohort study. *J Asthma* 2017;**54**:250–7. doi:10.1080/02770903.2016.1211142

35 Marra F, Parhar K, Huang B, *et al*. Risk Factors for Herpes Zoster Infection: A Meta-Analysis. *Open Forum Infect Dis* 2020;**7**. doi:10.1093/OFID/OFAA005

36 John AR, Canaday DH. Herpes Zoster in the Older Adult. *Infect. Dis. Clin. North Am.* 2017;**31**:811–26. doi:10.1016/j.idc.2017.07.016

37 Mortazavi H, Safi Y, Baharvand M, *et al*. Diagnostic Features of Common Oral Ulcerative Lesions: An Updated Decision Tree. *Int. J. Dent.* 2016;**2016**. doi:10.1155/2016/7278925

38 Edwards MR, Strong K, Cameron A, *et al*. Viral infections in allergy and immunology: How allergic inflammation influences viral infections and illness. *J. Allergy Clin. Immunol.* 2017;**140**:909–20. doi:10.1016/j.jaci.2017.07.025

39 Makris S, Johnston S. Recent advances in understanding rhinovirus immunity [version 1;

- 1  
2  
3 peer review: 4 approved]. F1000Research. 2018;**7**. doi:10.12688/F1000RESEARCH.15337.1  
4  
5  
6 40 Hirano T, Matsunaga K. Late-onset asthma: current perspectives. *J Asthma Allergy*  
7  
8 2018;**11**–9. doi:10.2147/JAA.S125948  
9  
10 41 Brown J. Salivary Gland Diseases: Presentation and Investigation. *Prim Dent J* 2018;**7**:48–  
11  
12 57. <https://journals-sagepub-com.libproxy.helsinki.fi/doi/pdf/10.1308/205016818822610280>  
13  
14 (accessed 20 Sep 2021).  
15  
16  
17 42 Dreyer LN, Brown GC. Oral manifestations of psoriasis. Clinical presentation and  
18  
19 management. *N Y State Dent J* 2012;**78**:14–  
20  
21 8. <http://www.ncbi.nlm.nih.gov/pubmed/22803270>  
22  
23  
24 43 Ustiugova AS, Korneev K V, Kuprash D V, *et al*. Functional SNPs in the Human  
25  
26 Autoimmunity-Associated Locus 17q12-21. *Genes (Basel)* 2019;**10**.  
27  
28 doi:10.3390/genes10020077  
29  
30  
31 44 Mattsson U, Warfvinge G, Jontell M. Oral psoriasis - A diagnostic dilemma: A report of two  
32  
33 cases and a review of the literature. *Oral Surg Oral Med Oral Pathol Oral Radiol*  
34  
35 2015;**120**:e183–9. doi:10.1016/j.oooo.2015.03.005  
36  
37  
38 45 Takeshita J, Grewal S, Langan SM, *et al*. Psoriasis and comorbid diseases: Epidemiology. *J*  
39  
40 *Am Acad Dermatol* 2017;**76**:377–90. doi:10.1016/j.jaad.2016.07.064  
41  
42  
43 46 Sankar V, Noujeim M. Oral Manifestations of Autoimmune and Connective Tissue  
44  
45 Disorders. *Atlas Oral Maxillofac Surg Clin NA* 2017;**25**:113–26.  
46  
47 doi:10.1016/j.cxom.2017.04.004  
48  
49  
50 47 Hernán MA. The Hazards of Hazard Ratios. *Epidemiology* 2010;**21**:13.  
51  
52 doi:10.1097/EDE.0B013E3181C1EA43  
53  
54  
55 48 Zhou X, Zhang W, Liu X, *et al*. Interrelationship between diabetes and periodontitis: Role of  
56  
57 hyperlipidemia. *Arch Oral Biol* 2015;**60**:667–74.  
58  
59 doi:10.1016/J.ARCHORALBIO.2014.11.008  
60

1  
2  
3  
4  
5  
6  
7  
8  
9  
10  
11  
12  
13  
14  
15  
16  
17  
18  
19  
20  
21  
22  
23  
24  
25  
26  
27  
28  
29  
30  
31  
32  
33  
34  
35  
36  
37  
38  
39  
40  
41  
42  
43  
44  
45  
46  
47  
48  
49  
50  
51  
52  
53  
54  
55  
56  
57  
58  
59  
60

49 Soledade-Marques KR, Gomes-Filho IS, da Cruz SS, *et al.* Association between periodontitis and severe asthma in adults: A case-control study. *Oral Dis* 2018;**24**:442–8.  
doi:10.1111/odi.12737

For peer review only



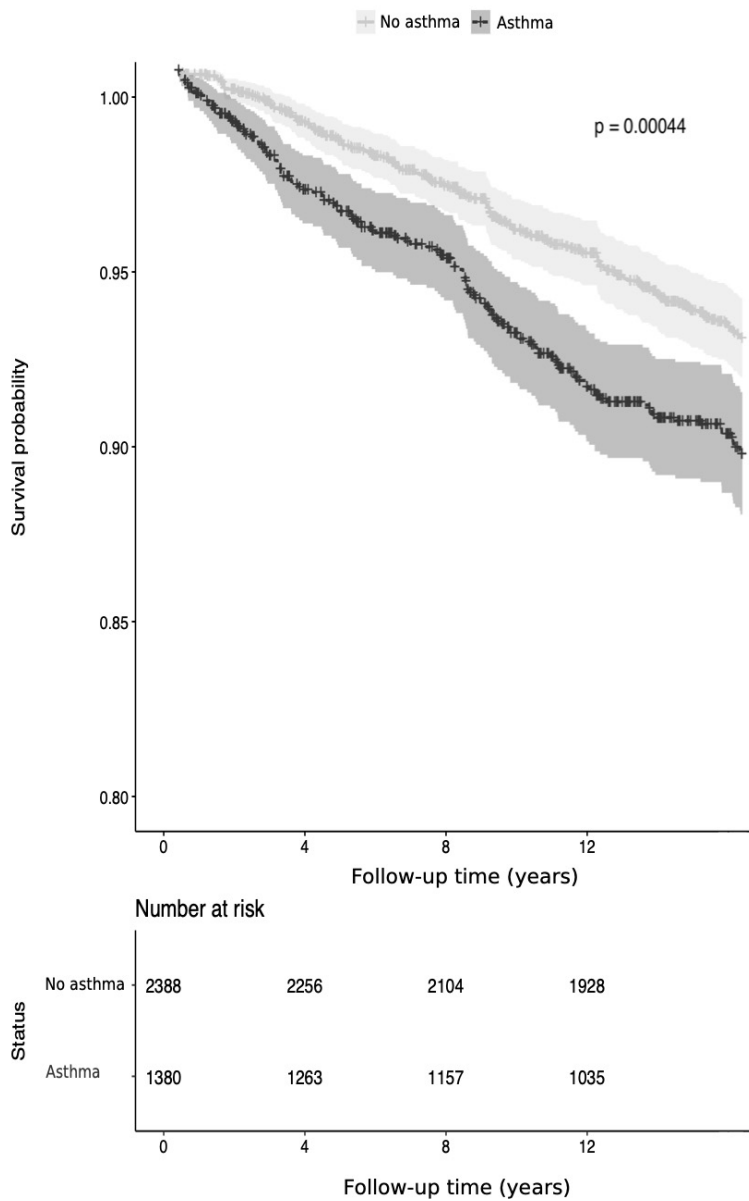

Figure 1 Kaplan–Meier survival curve of the difference in oral health–related diseases amongst asthmatics and nonasthmatics. P-value for the log-rank test.

366x457mm (72 x 72 DPI)

## STROBE Statement—checklist of items that should be included in reports of observational studies

|                              | Item No. | Recommendation                                                                                                                                                                             | Page No. | Relevant text from manuscript |
|------------------------------|----------|--------------------------------------------------------------------------------------------------------------------------------------------------------------------------------------------|----------|-------------------------------|
| <b>Title and abstract</b>    | 1        | (a) Indicate the study's design with a commonly used term in the title or the abstract                                                                                                     | 1        |                               |
|                              |          | (b) Provide in the abstract an informative and balanced summary of what was done and what was found                                                                                        | 2-3      |                               |
| <b>Introduction</b>          |          |                                                                                                                                                                                            |          |                               |
| Background/rationale         | 2        | Explain the scientific background and rationale for the investigation being reported                                                                                                       | 4-6      |                               |
| Objectives                   | 3        | State specific objectives, including any prespecified hypotheses                                                                                                                           | 6        |                               |
| <b>Methods</b>               |          |                                                                                                                                                                                            |          |                               |
| Study design                 | 4        | Present key elements of study design early in the paper                                                                                                                                    | 6-7      |                               |
| Setting                      | 5        | Describe the setting, locations, and relevant dates, including periods of recruitment, exposure, follow-up, and data collection                                                            | 6-7      |                               |
| Participants                 | 6        | (a) <i>Cohort study</i> —Give the eligibility criteria, and the sources and methods of selection of participants. Describe methods of follow-up                                            | 7        |                               |
|                              |          | <i>Case-control study</i> —Give the eligibility criteria, and the sources and methods of case ascertainment and control selection. Give the rationale for the choice of cases and controls | N/A      |                               |
|                              |          | <i>Cross-sectional study</i> —Give the eligibility criteria, and the sources and methods of selection of participants                                                                      | N/A      |                               |
|                              |          | (b) <i>Cohort study</i> —For matched studies, give matching criteria and number of exposed and unexposed                                                                                   | 7        |                               |
|                              |          | <i>Case-control study</i> —For matched studies, give matching criteria and the number of controls per case                                                                                 | N/A      |                               |
| Variables                    | 7        | Clearly define all outcomes, exposures, predictors, potential confounders, and effect modifiers. Give diagnostic criteria, if applicable                                                   | 9-10     |                               |
| Data sources/<br>measurement | 8*       | For each variable of interest, give sources of data and details of methods of assessment (measurement). Describe comparability of assessment methods if there is more than one group       | 9-10     |                               |
| Bias                         | 9        | Describe any efforts to address potential sources of bias                                                                                                                                  | 18-19    |                               |
| Study size                   | 10       | Explain how the study size was arrived at                                                                                                                                                  | 7        |                               |

Continued on next page

|                        |     |                                                                                                                                                                                                              |       |
|------------------------|-----|--------------------------------------------------------------------------------------------------------------------------------------------------------------------------------------------------------------|-------|
| Quantitative variables | 11  | Explain how quantitative variables were handled in the analyses. If applicable, describe which groupings were chosen and why                                                                                 | 9-10  |
| Statistical methods    | 12  | (a) Describe all statistical methods, including those used to control for confounding                                                                                                                        | 10-11 |
|                        |     | (b) Describe any methods used to examine subgroups and interactions                                                                                                                                          | 10-11 |
|                        |     | (c) Explain how missing data were addressed                                                                                                                                                                  | 9     |
|                        |     | (d) <i>Cohort study</i> —If applicable, explain how loss to follow-up was addressed                                                                                                                          | N/A   |
|                        |     | <i>Case-control study</i> —If applicable, explain how matching of cases and controls was addressed                                                                                                           | N/A   |
|                        |     | <i>Cross-sectional study</i> —If applicable, describe analytical methods taking account of sampling strategy                                                                                                 | N/A   |
|                        |     | (e) Describe any sensitivity analyses                                                                                                                                                                        | N/A   |
| <b>Results</b>         |     |                                                                                                                                                                                                              |       |
| Participants           | 13* | (a) Report numbers of individuals at each stage of study—eg numbers potentially eligible, examined for eligibility, confirmed eligible, included in the study, completing follow-up, and analysed            | N/A   |
|                        |     | (b) Give reasons for non-participation at each stage                                                                                                                                                         | N/A   |
|                        |     | (c) Consider use of a flow diagram                                                                                                                                                                           | N/A   |
| Descriptive data       | 14* | (a) Give characteristics of study participants (eg demographic, clinical, social) and information on exposures and potential confounders                                                                     | 7-8   |
|                        |     | (b) Indicate number of participants with missing data for each variable of interest                                                                                                                          | N/A   |
|                        |     | (c) <i>Cohort study</i> —Summarise follow-up time (eg, average and total amount)                                                                                                                             | 11    |
| Outcome data           | 15* | <i>Cohort study</i> —Report numbers of outcome events or summary measures over time                                                                                                                          | 11-13 |
|                        |     | <i>Case-control study</i> —Report numbers in each exposure category, or summary measures of exposure                                                                                                         | N/A   |
|                        |     | <i>Cross-sectional study</i> —Report numbers of outcome events or summary measures                                                                                                                           | N/A   |
| Main results           | 16  | (a) Give unadjusted estimates and, if applicable, confounder-adjusted estimates and their precision (eg, 95% confidence interval). Make clear which confounders were adjusted for and why they were included | 13    |
|                        |     | (b) Report category boundaries when continuous variables were categorized                                                                                                                                    | 9     |
|                        |     | (c) If relevant, consider translating estimates of relative risk into absolute risk for a meaningful time period                                                                                             | N/A   |

Continued on next page

|                          |    |                                                                                                                                                                            |     |
|--------------------------|----|----------------------------------------------------------------------------------------------------------------------------------------------------------------------------|-----|
| Other analyses           | 17 | Report other analyses done—eg analyses of subgroups and interactions, and sensitivity analyses                                                                             | N/A |
| <b>Discussion</b>        |    |                                                                                                                                                                            |     |
| Key results              | 18 | Summarise key results with reference to study objectives                                                                                                                   | 19  |
| Limitations              | 19 | Discuss limitations of the study, taking into account sources of potential bias or imprecision. Discuss both direction and magnitude of any potential bias                 | 17  |
| Interpretation           | 20 | Give a cautious overall interpretation of results considering objectives, limitations, multiplicity of analyses, results from similar studies, and other relevant evidence | 19  |
| Generalisability         | 21 | Discuss the generalisability (external validity) of the study results                                                                                                      | 19  |
| <b>Other information</b> |    |                                                                                                                                                                            |     |
| Funding                  | 22 | Give the source of funding and the role of the funders for the present study and, if applicable, for the original study on which the present article is based              | 20  |

\*Give information separately for cases and controls in case-control studies and, if applicable, for exposed and unexposed groups in cohort and cross-sectional studies.

**Note:** An Explanation and Elaboration article discusses each checklist item and gives methodological background and published examples of transparent reporting. The STROBE checklist is best used in conjunction with this article (freely available on the Web sites of PLoS Medicine at <http://www.plosmedicine.org/>, Annals of Internal Medicine at <http://www.annals.org/>, and Epidemiology at <http://www.epidem.com/>). Information on the STROBE Initiative is available at [www.strobe-statement.org](http://www.strobe-statement.org).
